1 **The fast and superprocessive KIF1A predominately resides in a vulnerable one-head-bound state**  
2 **during its chemomechanical cycle**

3

4 **Taylor M. Zaniewski<sup>1</sup>, Allison M. Gicking<sup>2</sup>, John Fricks<sup>3</sup>, William O. Hancock<sup>2\*</sup>**

5

6 **<sup>1</sup>Department of Chemistry, Pennsylvania State University, University Park, PA.**

7 **<sup>2</sup>Department of Biomedical Engineering and Bioengineering Graduate Program, Pennsylvania State**  
8 **University, University Park, PA.**

9 **<sup>3</sup>School of Mathematical and Statistical Sciences, Arizona State University, Tempe, AZ.**

10

11 **\*Corresponding Author: William Hancock**

12 **E-mail: wohbio@engr.psu.edu**

13 **Running Title: The fast and superprocessive KIF1A chemomechanical cycle**

14 **Acknowledgements:** The authors thank members of Hancock Lab for their contributions and helpful discussions.

15 This work was supported by NIH grant number R01GM076476 to W.O.H.

16 **Abbreviations:** Mt, Microtubules; K-Mt, Kinesin bound to Microtubule; ATP, Adenosine triphosphate; TIRF, total  
17 internal reflection fluorescence; mant-ADP, (2'-(or-3')-O-(N-Methylanthraniloyl) Adenosine 5'-Diphosphate

18 **Keywords:** ATPase, kinesin, KIF1A, kinetics, Michaelis-Menten, microtubule, single-molecule tracking

19

## 20 **ABSTRACT**

21 Kinesin-3 are the fastest and most processive motors of the three neuronal transport kinesin families, yet  
22 the sequence of states and rates of kinetic transitions that comprise the chemomechanical cycle are poorly  
23 understood. We used stopped-flow fluorescence spectroscopy and single-molecule motility assays to  
24 delineate the chemomechanical cycle of the kinesin-3, KIF1A. Our bacterially expressed KIF1A construct,  
25 dimerized via a kinesin-1 coiled-coil, exhibits fast velocity and superprocessivity behavior similar to wild-  
26 type KIF1A. We established that the KIF1A forward step is triggered by hydrolysis of ATP and not by ATP  
27 binding, meaning that KIF1A follows the same chemomechanical cycle as established for kinesin-1 and-2.  
28 The ATP-triggered half-site release rate of KIF1A was similar to the stepping rate, indicating that during  
29 stepping, rear-head detachment is an order of magnitude faster than in kinesin-1 and kinesin-2. Thus,  
30 KIF1A spends the majority of its hydrolysis cycle in a one-head-bound state. Both the ADP off-rate and  
31 the ATP on-rate at physiological ATP concentration were fast, eliminating these steps as possible rate  
32 limiting transitions. Based on the measured run length and the relatively slow off-rate in ADP, we conclude  
33 that attachment of the tethered head is the rate limiting transition in the KIF1A stepping cycle. The fast  
34 speed, superprocessivity and load sensitivity of KIF1A can be explained by a fast rear head detachment  
35 rate, a rate-limiting step of tethered head attachment that follows ATP hydrolysis, and a relatively strong  
36 electrostatic interaction with the microtubule in the weakly-bound post-hydrolysis state.

37

## 38 **INTRODUCTION**

39 The kinesin-3 motor protein KIF1A is a neuronal transport motor responsible for the anterograde transport  
40 of synaptic vesicle precursors and other vesicular cargo along microtubules (Mt).<sup>1-4</sup> Mutations of KIF1A  
41 in humans can cause a range of afflictions known as KIF1A Associated Neurological Disorders (KAND)  
42 that include sensory and motor disabilities.<sup>5-7</sup> In some cases, these disorders are caused by neuronal cell  
43 death and axon degeneration or specific mutations leading to the hyperactivation of KIF1A and an

44 abundance of the correlative cargo at the synapse.<sup>8</sup> However, in most cases the links between the motor  
45 dysfunction and the resulting disease are not clear.

46 The kinesin-3 family is one of the largest of the 14 subfamilies in the kinesin superfamily,<sup>1,2,5,9-12</sup> and KIF1A  
47 is of particular interest due to a unique set of properties, including fast velocity,<sup>13</sup> superprocessivity,<sup>13-16</sup>  
48 low force resistance<sup>17</sup> and the ability to move processively as both a monomer and dimer.<sup>18-21</sup> The  
49 superprocessivity (long travel distance before detaching) of KIF1A has been explained by an electrostatic  
50 interaction between the positively charged loop-12 of KIF1A called the ‘K-loop’ and the negatively-  
51 charged C-terminal tail of tubulin.<sup>15,17,18,22-26</sup> An adaptation that increases microtubule affinity would  
52 generally be expected to slow the velocity rather than speed it up,<sup>27,28</sup> yet KIF1A steps 2.5-fold faster than  
53 kinesin-1. Furthermore, optical trapping studies and mixed motor assays have revealed that, despite the  
54 enhanced electrostatic association to the microtubule, kinesin-3 has a surprisingly low resistance to force  
55 and detaches under load.<sup>8,15,17,29-31</sup> How these opposing traits are reconciled in the same motor have yet to  
56 be fully understood.

57 Interpreting the chemomechanical properties of KIF1A and how the motor is tuned for its specific cellular  
58 functions requires a more complete understanding of the KIF1A chemomechanical cycle. Specifically, it  
59 remains to be determined whether the fast speed and superprocessivity of KIF1A result simply from  
60 differences in specific rate constants in the hydrolysis cycle, or whether they result from the KIF1A cycle  
61 having a different sequence of chemomechanical states than kinesin-1. In the kinesin-1 chemomechanical  
62 cycle (Fig. 1), it has been established that, following initial binding and release of ADP (state 3), kinesin-1  
63 waits for ATP binding with the tethered head in a rearward position.<sup>27,32,33</sup> ATP binding to the bound head  
64 then repositions the tethered head forward, and ATP hydrolysis triggers full neck linker docking, which  
65 positions the tethered head near its next binding site. The forward step is completed by the tethered head  
66 binding the microtubule and releasing its bound ADP to generate a tight-binding state 7.<sup>27,28,34-37</sup> The key  
67 transition that determines processivity in this model is the kinetic race out of state 5 – the race is won if the  
68 tethered head binds the next tubulin before the bound head detaches from the vulnerable ADP-Pi state.

69 Therefore, processivity requires that the rate of tethered head attachment be considerably faster than the  
70 rate of bound head dissociation from the microtubule.

71 Mapping this canonical kinesin-1 hydrolysis cycle to the characteristics of KIF1A, one or more transitions  
72 must be ~2.5 times faster than kinesin-1 to account for the faster stepping rate, and the probability of  
73 dissociating per cycle must be ~7-fold lower to account for its superprocessivity.<sup>27,28</sup> Although there are  
74 several ways this may be achieved, one intriguing possibility is KIF1A bypassing specific transition states  
75 in the cycle. By removing the need for the forward step to be triggered by either ATP hydrolysis (removing  
76 state 5) or ATP binding (removing both states 4 and 5), KIF1A could theoretically both reduce the total  
77 number of sequential forward transitions in the cycle (gaining speed) and avoid the vulnerable one-head-  
78 bound ADP-Pi State 5 (enhancing processivity). The goal of the present work is to use single-molecule  
79 tracking and pre-steady-state kinetic analysis of dimeric KIF1A to define the sequence of states that make  
80 up the KIF1A chemomechanical cycle and quantify the transition rates between these states. By delineating  
81 the chemomechanical cycle of KIF1A, we provide a mechanistic explanation of the motor's  
82 superprocessivity, high velocity and sensitivity to load.

83

## 84 RESULTS

85 To form a stable dimer and allow for direct comparison of the properties of KIF1A to kinesin-1 and kinesin-  
86 2 constructs characterized previously<sup>27,28,34</sup>, we bacterially expressed a *Rattus norvegicus* KIF1A construct  
87 dimerized via the *Drosophila melanogaster* KHC neck coil (Fig. 2A and 2B). Two different lengths of the  
88 kinesin-1 neck coil were used in these KIF1A constructs for distinct purposes. For biochemical assays, we  
89 used KIF1A-406, which includes 61 residues from the kinesin-1 (*DmKHC*) neck coil added after the native  
90 KIF1A head and neck linker. For microscopy, we used KIF1A-560-GFP, which includes 216 residues from  
91 kinesin-1 that include the neck coil and coil-1, followed by a C-terminal GFP. All experiments were carried  
92 out in 80 mM PIPES buffer (BRB80) to ensure physiologically relevant ionic strength of the solution.

93 *KIF1A is fast and superprocessive*

94 Using single-molecule TIRF microscopy at 2 mM ATP, we measured the velocity of KIF1A-560-GFP from  
95 kymograph evaluation by the two following methods: 1) linear segments of uninterrupted stepping  
96 (excluding pauses) and 2) total runs (including pauses) (Fig. 2C). We determined a velocity of  $1.77 \pm 0.4$   
97  $\mu\text{m/s}$  (mean  $\pm$  SD,  $N = 285$ ), when pauses are excluded, and  $1.56 \pm 0.5 \mu\text{m/s}$  (mean  $\pm$  SD,  $N = 534$ ) for  
98 entire runs (Fig. 2D). Assuming an 8-nm step size, these velocities translate to stepping rates of  $220 \pm 50 \text{ s}^{-1}$   
99 and  $195 \pm 63 \text{ s}^{-1}$ , respectively. In addition to velocity, we also determined a run length of  $3.6 \pm 0.04 \mu\text{m}$   
100 (mean  $\pm$  95% confidence interval) (Fig. 2E). This run length is an underestimate due to the finite  
101 microtubule lengths in the assay, a common limitation seen in KIF1A studies.<sup>13-15</sup> Therefore, we developed  
102 a statistical model that accounts for runs that terminate prematurely due to motors reaching the end of the  
103 microtubule (see Methods). Using this correction, we estimate a true average run length of  $5.6 \pm 0.4 \mu\text{m}$   
104 (mean  $\pm$  SD). Considering this estimated run length and the velocity over the total trace, we determined a  
105 mean run time of  $3.6 \pm 1.2 \text{ s}$ , corresponding to a motor off-rate of  $0.28 \pm 0.09 \text{ s}^{-1}$ . The velocity and run  
106 length determined here for our bacterially expressed KIF1A dimer are consistent with the fast velocity and  
107 superprocessivity reported in previous studies.<sup>14,15</sup>

108 *ATP Binding and Hydrolysis are both required for fast forward stepping of KIF1A*

109 The features of the KIF1A chemomechanical cycle that underlie the fast velocity and superprocessivity are  
110 not known. Based on the similarities in structure and cellular function to kinesin-1, a logical hypothesis is  
111 that kinesin-3 follows the same chemomechanical model that has been delineated for kinesin-1. However,  
112 this has never been experimentally confirmed.<sup>27,28,36,38,39</sup> Furthermore, it is possible that, rather than  
113 resulting from quantitative differences in rate constants between the kinesin families, the faster speed and  
114 enhanced processivity of KIF1A may result from qualitative differences in the sequence of states that make  
115 up the chemomechanical cycle. One candidate is the state that triggers the forward step. Recent experiments  
116 demonstrated that instead it is ATP hydrolysis, rather than ATP binding alone, that triggers the forward

117 step in kinesin-1.<sup>36,38</sup> In principle, reducing the time the motor spends in the 1HB state, either by removing  
118 the need for an ATP-binding or ATP-hydrolysis step-trigger, could increase the overall stepping rate by  
119 speeding a key process in the cycle, and increase the processivity of the motor by reducing the probability  
120 of the motor dissociating before completing its forward step. To this end, we designed a series of  
121 experiments to ask whether the sequence of biochemical states that triggers the forward step of KIF1A  
122 matches those of kinesin-1 and -2. As shown in Fig. 3A, following detachment of the rear head from the  
123 rear binding site, there are three potential events that could trigger the KIF1A forward step: 1) the forward  
124 step could occur spontaneously while the bound head is in the Apo state; 2) ATP binding to the bound head  
125 could trigger the forward step; or 3) ATP hydrolysis by the bound head could trigger the forward step.

126 To test whether the forward step can occur spontaneously, we asked if, upon binding to the microtubule in  
127 the absence of free nucleotide, the motor releases one or both bound ADP (see Methods for details).<sup>40</sup> If no  
128 trigger is required for the forward step, then the motor should release both ADP upon nucleotide binding,  
129 whereas if a trigger is required for the forward step, then only one ADP will be released. To measure the  
130 release of the nucleotide from the motor head domain, we used mant-ADP whose fluorescence is enhanced  
131 upon motor binding. Thus, mADP dissociation from the motor can be monitored by a decrease in mADP  
132 fluorescence. In the control experiment, KIF1A in mADP was flushed against microtubules and 1 mM  
133 ATP, which triggers stepping and rapid release of both bound mADP (Fig. 3B, blue trace). In the absence  
134 of ATP, however, the fluorescence only decreased by half, indicating that KIF1A released only half of its  
135 nucleotide upon microtubule binding (Fig. 3B, green trace). Thus, a trigger in the form of ATP binding or  
136 ATP hydrolysis by the bound head is necessary to catalyze the forward step of KIF1A. This result nullifies  
137 the first potential pathway in Fig. 3A.

138 To determine whether ATP binding alone is sufficient to trigger the forward step or if hydrolysis is  
139 necessary, we used a nucleotide-triggered half-site release assay first used by Ma and Taylor.<sup>41</sup> In this  
140 experiment, motors and microtubules are combined in the absence of free nucleotide to produce a 1HB  
141 ATP waiting state with mADP in the tethered head. Different concentrations of ATP or ATP analogs are

142 then flushed against this complex and the rate of mADP release from the tethered head is measured. ATP  
143 triggered a maximal half-site release rate of  $172 \pm 10 \text{ s}^{-1}$  (fit  $\pm$  95% CI) (Fig. 3C, blue trace), which is similar  
144 to the motor stepping rate. If only ATP binding is required to trigger the step, then the slowly hydrolyzed  
145 ATP analog ATP $\gamma$ S or the nonhydrolyzable ATP analog AMPPNP should also trigger half-site release at a  
146 similar rate. Instead, ATP $\gamma$ S triggered half-site release of only  $24.9 \pm 6.4 \text{ s}^{-1}$  (fit  $\pm$  95% CI) (Fig. 3C, red  
147 trace) and AMPPNP triggered a maximal half-site release rate of only  $0.44 \pm 0.03 \text{ s}^{-1}$  (fit  $\pm$  95% CI) (Fig.  
148 3C, green trace). These rates are both significantly slower than either the ATP-triggered half-site release  
149 rate or the stepping rate, thus nullifying our second potential pathway in Fig. 3A. In a control experiment,  
150 the KIF1A single-molecule velocity in 1 mM ATP $\gamma$ S was  $180 \pm 0.2 \text{ nm/s}$  (mean  $\pm$  SD, data not shown),  
151 corresponding to 23 steps/s and indicating that the elevated half-site release in ATP $\gamma$ S compared to  
152 AMPPNP likely results from ATP hydrolysis. Thus, we conclude that, during the normal stepping cycle,  
153 ATP-hydrolysis is required to trigger the forward step, which is completed by the forward head releasing  
154 ADP to generate a tightly-bound state (shaded pathway in Fig. 3A). The observation that both ATP binding  
155 and hydrolysis are required for the forward step indicates that KIF1A follows a similar hydrolysis cycle to  
156 kinesin-1 and -2,<sup>27,34</sup> and therefore the enhanced motility must result from quantitative differences in  
157 transition rates between each state.

### 158 *Transition rates in the KIF1A chemomechanical cycle*

159 Having defined the sequence of the states in the KIF1A chemomechanical cycle, we then measured the  
160 kinetic rates of each of the transitions KIF1A undergoes upon interaction with the microtubule. Preceding  
161 the stepping cycle, the motor protein must first land on the microtubule. Therefore, to gain insight into the  
162 KIF1A-microtubule affinity, we measured the microtubule on-rate in solution (step 1 $\rightarrow$ 2 in Fig. 1). By  
163 flushing motors against varying concentrations of microtubules, we monitored mADP release from the  
164 motor upon microtubule binding.<sup>34</sup> When mADP-bound motors are flushed against low concentrations of  
165 microtubules, the microtubule binding step is rate limiting, enabling determination of the first-order on-rate  
166 for microtubule binding. From this assay, we calculated a  $k_{\text{on}}^{\text{Mt}}$  of  $17 \pm 4 \mu\text{M}^{-1}\text{s}^{-1}$ . (Fig. 4A, fit  $\pm$  95 % CI).

167 Notably, this rate is approximately 15-fold faster than the corresponding rate for kinesin-1<sup>42</sup> (Table 2) and  
168 is consistent with fast KIF1A single-molecule landing rates observed previously.<sup>15</sup> The second question we  
169 addressed was whether ATP hydrolysis is tightly coupled to motor stepping; if the motor undergoes futile  
170 hydrolysis cycles during stepping, then the Fig. 1 model will have to be modified to explain KIF1A. To  
171 measure the ATP hydrolysis cycle rate, we used an enzyme-coupled assay to measure the KIF1A ATPase  
172 at varying microtubule concentrations. Fitting with the Michaelis-Menten equation, we measured a  $k_{\text{cat}}$  of  
173  $115 \pm 16 \text{ s}^{-1}$  and a  $K_m$  of  $1.2 \pm 0.5 \mu\text{M}$  (Fig. 4B, fit  $\pm 95\%$  CI). This  $k_{\text{cat}}$  is lower than the total stepping rate  
174 of  $195 \pm 63 \text{ s}^{-1}$ , determined from single-molecule velocity including pauses (Fig. 2D), arguing against the  
175 motor undergoing any futile cycles of ATP hydrolysis under no load. The  $k_{\text{cat}}$  calculated here may be  
176 underestimated since the active motor concentration determined by microtubule pelleting assay in  
177 AMPPNP (see Methods) may be an overestimation due to inactive motors that irreversibly bind. Thus,  
178 because our transient kinetics investigations are generally studying only one motor step, we choose to use  
179 the uninterrupted stepping rate at 25°C of  $220 \pm 50 \text{ s}^{-1}$  (Fig. 2D) as the best estimate of the overall KIF1A  
180 chemomechanical cycle rate.

181 To identify the rate limiting step in the KIF1A cycle, we designed experiments to measure the rates of the  
182 specific transitions within the cycle and compared them to the overall stepping rate. Possible transitions  
183 that could determine the overall KIF1A cycle rate (Fig. 1) include: 1) ATP binding ( $k_{\text{on}}^{\text{ATP}}$ ), 2) ATP  
184 hydrolysis ( $k_{\text{hyd}}$ ), 3) tethered-head attachment to the next tubulin ( $k_{\text{on}}^{\text{TH}}$ ), 4) ADP release by the tethered  
185 head ( $k_{\text{off}}^{\text{ADP}}$ ), and 5) rear-head detachment ( $k_{\text{off}}^{\text{RH}}$ ).

### 186 *ATP binding and ADP release are not rate-limiting*

187 The first portion of the stepping cycle that can be excluded as a possible rate-limiting step is the ATP on-  
188 rate (state 3  $\rightarrow$  4 in Fig. 1). This can be shown by the observation that in the ATP-triggered half-site release  
189 experiment in Fig. 3C, the maximal rate was  $172 \text{ s}^{-1}$ , and the half-maximal rate was achieved at an ATP  
190 concentration of  $119 \mu\text{M}$ . Thus, at 1 mM ATP the curve has reached a plateau indicating that ATP binding



191 is not rate limiting. Going further, the half-max ( $K_{0.5}$ ) can be used to estimate a lower limit for ATP binding,  
192 as follows: If ATP binding were irreversible and the reaction is treated as a sequence of ATP binding  
193 followed by the remainder of steps, then it follows that at the ATP concentration that produces half-maximal  
194 release, half of the time is taken by ATP binding. At saturating ATP (where ATP binding is very fast), the  
195 release rate is  $172 \text{ s}^{-1}$ , meaning that at the  $K_{0.5}$  of  $119 \mu\text{M}$  ATP, the binding rate of ATP is  $172 \text{ s}^{-1}$  (followed  
196 by the remainder of the steps at  $172 \text{ s}^{-1}$ ). This  $K_{0.5}$  corresponds to a second-order on-rate for ATP binding  
197 of  $172 \text{ s}^{-1} / 119 \mu\text{M} = 1.4 \mu\text{M}^{-1}\text{s}^{-1}$ , which at  $1 \text{ mM}$  ATP corresponds to a rate of  $1400 \text{ s}^{-1}$ , much faster than  
198 the  $220 \text{ s}^{-1}$  stepping rate. Also, if ATP binding is reversible, which is likely the case, then the on-rate would  
199 need to be even faster. We therefore conclude that at physiological ATP concentrations, ATP binding is  
200 far from rate limiting in the KIF1A hydrolysis cycle.

201 The second step we were able to rule out as rate-limiting is ADP release (state  $6 \rightarrow 7$  in Fig. 1). To do this  
202 we measured the rate of nucleotide exchange assays in the strained two-head-bound (2HB) state. We  
203 generated a 2HB state by incubating KIF1A with microtubules in the presence of AMPPNP, which results  
204 in the rear head trapping the nonhydrolyzable nucleotide and the front head being trapped in a tight-binding  
205 apo state.<sup>27,34,43,44</sup> Flushing this complex against mADP results in reversible nucleotide binding to the  
206 leading head. From this experiment, we determined an ADP off-rate of  $616 \pm 86 \text{ s}^{-1}$  (mean  $\pm$  SD) from the  
207 strained leading head (Fig 5A). As this measurement is near the limit of the instrument's capabilities, there  
208 was not a clear increase in the observed rate with increasing mADP concentrations and thus, our estimate  
209 represents an average across nucleotide concentrations. To measure microtubule-stimulated ADP off-rate  
210 in a different way, we measured the rate of mADP exchange when the motor is bound to the microtubule  
211 in the one-head-bound state. As shown in the half-site release experiment (Fig. 3C), incubating KIF1A  
212 with microtubules in the absence of added nucleotide results in release of one ADP and formation of a 1HB  
213 complex. By flushing this complex against different concentrations of mADP, we measured an unstrained  
214 ADP on-rate of  $29 \pm 15 \mu\text{M}^{-1} \text{ s}^{-1}$  and unstrained ADP off-rate of  $354 \pm 78 \text{ s}^{-1}$  (Fig 5B, fit  $\pm$  95% CI).  
215 Although this unstrained ADP off-rate is likely less relevant to the normal stepping cycle than the strained

216 rate, it is still faster than the  $220 \text{ s}^{-1}$  overall stepping rate. Finally, to rule out the possibility that mADP off-  
217 rates are not representative of unlabeled ADP, we measured ADP off-rates from KIF1A in the absence of  
218 microtubules. From these assays (see Methods for details), the unlabeled-ADP off-rate of  $0.26 \pm 0.005 \text{ s}^{-1}$   
219 (fit  $\pm 95\%$  CI, Fig 5C) was in good agreement with the mADP off-rate of  $0.27 \pm 0.001 \text{ s}^{-1}$  (fit  $\pm 95\%$  CI,  
220 Fig 5D). Notably, these solution off-rates were roughly 20-fold faster than the corresponding ADP off-rate  
221 for kinesin-1, which is approximately  $0.01 \text{ s}^{-1}$ .<sup>45</sup> Although this off-rate in solution does not play a part in  
222 the normal ATP-stimulated chemomechanical cycle on the microtubule, it is indicative of differences in the  
223 nucleotide binding affinity that may relate to the fast KIF1A stepping speed. In summary, the  $\sim 600 \text{ s}^{-1}$   
224 strained mADP off-rate, the  $\sim 350 \text{ s}^{-1}$  unstrained mADP off-rate, and the similarity in solution off-rates for  
225 ADP and mADP argue strongly that ADP release is not the rate limiting step in the overall stepping cycle  
226 of KIF1A.

### 227 *Rear-head detachment is fast*

228 In the kinesin-1 and kinesin-2 chemomechanical cycles, rear-head detachment is at least partially rate-  
229 limiting.<sup>27,34,42</sup> This rate (State 7 $\rightarrow$ 3 in Fig. 1) can be calculated from the difference between the duration  
230 (inverse of the rate constant) observed in the ATP-triggered half-site release assay (States 3-7 in Fig. 1) and  
231 the total step duration (inverse of the stepping rate). Based on previous work, kinesin-1 has a step duration  
232 of 15.4 ms and spends 6.5 ms transitioning from the 2HB to 1HB state during rear-head detachment (Table  
233 2).<sup>27</sup> Similarly, rear-head detachment in kinesin-2 (11.2 ms) makes up 50% of the total cycle time (22.4  
234 ms) (Table 2).<sup>34</sup> To determine whether kinesin-3 follows this same trend, we compared the ATP-triggered  
235 half-site release rate (Fig. 3C) to the stepping rate. The pause-free stepping rate of  $220 \text{ s}^{-1}$  (Fig. 2D) converts  
236 to a step duration of  $4.5 \pm 1.0 \text{ ms}$ . The maximal ATP-triggered half-site release rate of  $172 \text{ s}^{-1}$  (Fig. 3C)  
237 corresponds to a duration of  $5.8 \pm 0.4 \text{ ms}$ . The similarity of these durations means that  $k_{\text{off}}^{\text{RH}}$  is faster than  
238 we can measure and that the rear-head detachment rate is not the rate-limiting step in the KIF1A hydrolysis  
239 cycle. Thus, the motor spends only a small fraction of its hydrolysis cycle in a 2HB state.

240 *Tethered-head attachment is rate-limiting*

241 Since we have excluded  $k_{\text{off}}^{\text{RH}}$ ,  $k_{\text{on}}^{\text{ATP}}$ , and  $k_{\text{off}}^{\text{ADP}}$  as potential rate limiting steps of the cycle, we are left with  
242 the rate-limiting step being either ATP hydrolysis ( $k_{\text{hyd}}$ ) or tethered head attachment ( $k_{\text{on}}^{\text{TH}}$ ). Measuring  $k_{\text{hyd}}$   
243 generally requires quenched flow approaches, which are technically challenging for such a fast motor.  
244 However, because processivity can be considered as a kinetic race between detachment of the bound head  
245 and attachment of the tethered head (state 5 in Fig. 1), we can use single-molecule motility measurements  
246 to estimate  $k_{\text{on}}^{\text{TH}}$ . To quantify the rate of KIF1A detachment from the post-hydrolysis state, we used the ADP  
247 state as a proxy for this weakly-bound state and measured single-molecule binding durations in varying  
248 ADP concentrations (Fig. 6A and B). Microtubule off-rates at each [ADP] were obtained by fitting to the  
249 exponential dwell time distributions (Fig. 6C). A hyperbolic fit (see Methods) revealed a maximum off-  
250 rate of  $0.27 \pm 0.11 \text{ s}^{-1}$  in ADP, an off-rate in the apo state of  $0.09 \pm 0.002 \text{ s}^{-1}$ , and a  $K_{0.5}$ , representing the  $K_D$   
251 of KIF1A for ADP when bound to the microtubule, of  $93 \pm 204 \mu\text{M}$  (Fig. 6D, fit  $\pm 95\%$  CI). This KIF1A  
252 off-rate in ADP is approximately 5-fold slower than for kinesin-1 and almost 7-fold slower than for kinesin-  
253 2 (Fig. 6D).<sup>27,28,34,42</sup> Importantly, this KIF1A off-rate in ADP is very similar to the off-rate of the motor  
254 during a processive run, which we calculated as  $0.28 \pm 0.09 \text{ s}^{-1}$  (Fig. 2D). If the detachment rate during  
255 stepping is considered simply as the off-rate in the weakly-bound state multiplied by the fraction of time in  
256 the weakly-bound state, then it follows that the motor must spend the majority of its cycle in the weakly-  
257 bound post-hydrolysis state. This implies that tethered head attachment is rate limiting, rather than  
258 hydrolysis.

259 To calculate the tethered head attachment rate more quantitatively, we can compare the motor dissociation  
260 rate in ADP to the probability the motor will detach per step it takes along the microtubule in ATP.  
261 Following ATP hydrolysis (state 5 in Fig. 1), we consider processivity as a race between the tethered head  
262 completing the forward step with a rate  $k_{\text{on}}^{\text{TH}}$  and the bound head dissociating from the microtubule at a rate  
263  $k_{\text{detach}}^{\text{ADP}}$ .<sup>28</sup> The probability of the motor detaching per step is:

$$P_{\text{detach}} = \frac{k_{\text{detach}}^{\text{ADP}}}{k_{\text{on}}^{\text{TH}} + k_{\text{detach}}^{\text{ADP}}} \approx \frac{k_{\text{detach}}^{\text{ADP}}}{k_{\text{on}}^{\text{TH}}} \quad \text{Eq. 1}$$

264 Where, for a highly processive motor,  $k_{\text{on}}^{\text{TH}} \gg k_{\text{detach}}^{\text{ADP}}$ . We can rearrange this kinetic rate equation (Eq. 1)  
265 to solve for  $k_{\text{on}}^{\text{TH}}$ . KIF1A has an estimated run length of  $5.6 \pm 0.4 \mu\text{m}$  (Fig 2E), meaning it takes  
266 approximately 700 steps before dissociating; thus, the probability of detaching per step is 1/700. Also, the  
267 KIF1A off-rate in ADP is  $0.27 \pm 0.11 \text{ s}^{-1}$  (Fig 6D). Together, these values indicate a tethered head  
268 attachment rate of  $189 \pm 78 \text{ s}^{-1}$ . This rate corresponds to a duration in the 1HB state following ATP  
269 hydrolysis of  $5.3 \pm 2.2 \text{ ms}$ , which is comparable to the total cycle duration of  $4.5 \pm 1.0 \text{ ms}$  (Fig 2D). In  
270 support of this rate determination, we can calculate  $k_{\text{on}}^{\text{TH}}$  using the property that the total stepping rate is  
271 made up of the sequential transitions that make up the chemomechanical cycle (see Methods Eq. 3).  
272 Inputting the measured ATP on-rate and ADP off-rate and assuming that trailing head detachment and ATP  
273 hydrolysis are both very fast results in an estimated  $k_{\text{on}}^{\text{TH}}$  of  $286 \text{ s}^{-1}$ , similar to the  $189 \pm 78 \text{ s}^{-1}$  determined  
274 based on the processivity and to the  $220 \text{ s}^{-1}$  total stepping rate. To summarize, comparison of the KIF1A  
275 off-rate in the weak-binding state to either the motor off-rate in ATP or to the probability of detaching per  
276 step yields a consistent conclusion that tethered-head attachment is the rate-limiting step in the KIF1A  
277 chemomechanical cycle and that KIF1A spends the bulk of its cycle in a weak-binding 1HB state.

278

## 279 **DISCUSSION**

280 In this work, we find that the KIF1A chemomechanical cycle follows the same sequence of states as  
281 established for kinesin-1 and kinesin-2,<sup>27,34,38</sup> and that the motor's fast stepping rate and superprocessivity  
282 result from differences in specific transition rates in the chemomechanical cycle. Compared to transport  
283 motors in the kinesin-1 and -2 families, the KIF1A chemomechanical cycle is distinctive in having: 1) an  
284 order of magnitude faster rear-head detachment rate; 2) a rate-limiting tethered-head attachment rate; and

285 3) relatively slow dissociation from the low affinity post-hydrolysis state. The measured KIF1A rate  
286 constants are summarized in Table 1. A comparison between the chemomechanical cycles of KIF1A and  
287 kinesin-1 and -2 are presented in Fig. 7 and summarized in Table 2. Below, we account for the specific  
288 motor characteristics of KIF1A in terms of our measured kinetic rates and affinities.

### 289 *Origin of fast Velocity*

290 The KIF1A property that most contributes to its faster stepping rate is the rapid rear-head detachment rate.  
291 Nucleotide-triggered half-site release assays provide a convenient estimation of this transition rate because  
292 the measurement includes every transition in the chemomechanical cycle except rear-head detachment.  
293 Comparison to the overall stepping rate, which includes all transitions in the cycle, thus yields the rear-head  
294 detachment rate. For KIF1A, the ATP-triggered half-site release rate agrees with the stepping rate to within  
295 experimental error (Fig. 3C), indicating that rear head detachment is faster than we are able to measure. As  
296 a comparison, a recent kinesin-1 study measured a stepping rate of  $65\text{ s}^{-1}$  (15.4 ms) and an ATP-triggered  
297 half-site release rate of  $112\text{ s}^{-1}$  (8.9 ms). This yields a calculated rear-head detachment rate for kinesin-1 of  
298  $155\text{ s}^{-1}$  (6.5 ms), which approaches half of the overall cycle time (Fig. 7, Table 2).<sup>27,28</sup> Similarly, in the slow  
299 moving kinesin-5, rear-head detachment is the rate limiting state, ensuring the motor spends the bulk of its  
300 cycle in a two-heads-bound state.<sup>46</sup>

301 The ability to quickly detach the rear-head from the microtubule appears to be in conflict with the slow  
302 microtubule off-rate of KIF1A in the ADP state, but upon closer inspection, these rates can be reconciled.  
303 It has been clearly established that this relatively high microtubule affinity of KIF1A in the ADP state  
304 results from electrostatic interaction of the positively charged loop 12 with the negatively charged C-  
305 terminal tail of tubulin.<sup>18,24</sup> Additionally, the diffusive behavior of KIF1A along microtubules in ADP  
306 indicates that electrostatic interactions with any given tubulin are fleeting, and that the motor remains bound  
307 to the microtubule by renewing electrostatic interactions with different tubulin subunits along the lattice.<sup>15,24</sup>  
308 Thus, the measured off-rate of  $0.27\text{ s}^{-1}$  (Fig. 6D) in ADP does not represent the off-rate from individual  
309 tubulin but rather from the entire microtubule. Secondly, the rear-head detachment rate is thought to be

310 accelerated by inter-head tension when the motor is in the two-heads-bound state,<sup>47,48</sup> which contrasts with  
311 the unloaded off-rate in ADP. Of note, we found that the microtubule off-rate in the strong-binding apo  
312 state is more than an order of magnitude faster in KIF1A than in kinesin-1 (Fig. 6D).<sup>49</sup> Thus, one possible  
313 interpretation is that in weak-binding states KIF1A is stabilized by more electrostatic interactions with the  
314 microtubule than is kinesin-1, but kinesin-1 forms greater stabilizing interactions with the microtubule in  
315 strong-binding states. Previous CryoEM and Molecular Dynamics studies have noted differences between  
316 the microtubule binding interfaces of kinesin-3 and kinesin-1,<sup>50,51</sup> but they are unable to clearly account for  
317 this lower affinity in the apo state.

318 The faster stepping rate of KIF1A results from not only a faster rear head detachment rate, but also a faster  
319 tethered head binding rate compared to kinesin-1 and -2 (Fig. 7, Table 2).<sup>28,34</sup> This faster tethered head  
320 binding rate is qualitatively consistent with the fast microtubule on-rate of KIF1A, measured by stopped  
321 flow here and from landing rates in previous single-molecule investigations.<sup>15</sup> However, compared to  
322 kinesin-1, KIF1A has a 15-fold faster  $k_{\text{on}}^{\text{Mt}}$ , but less than two-fold faster tethered head attachment rate. Thus,  
323 the electrostatic interactions that likely determine the fast  $k_{\text{on}}^{\text{Mt}}$ , are not the dominant factor in tethered head  
324 binding during motor stepping. One potential explanation for this kinetic discrepancy is that the tethered  
325 head attachment rate is determined not by the association kinetics between the tethered head and the  
326 microtubule, but rather by the kinetics of neck linker docking. A recent structural and Molecular Dynamics  
327 study found that, compared to kinesin-1, neck linker docking in KIF1A is stabilized by fewer hydrogen  
328 bonds between the neck linker, cover strand, and catalytic core.<sup>52</sup> This reduced stabilization could manifest  
329 as a slower rate of neck linker docking in KIF1A. Consistent with this, we observed a relatively slow half-  
330 site release rate in ATP $\gamma$ S and AMPPNP compared to kinesin-1 and -2 (Fig. 6C).<sup>27,37,41</sup> In kinesin-1,  
331 AMPPNP triggers half-site release at roughly one-third the rate of ATP, consistent with ATP binding alone  
332 inducing at least partial neck linker docking.<sup>41</sup> In contrast, AMPPNP-triggered half-site release in KIF1A  
333 is more than two orders of magnitude slower than ATP, which is difficult to reconcile with any degree of  
334 neck linker docking preceding ATP hydrolysis.

335 Our conclusion that tethered head attachment is rate-limiting for KIF1A is supported by two lines of  
336 evidence, but there are caveats. The key finding is that the off-rate in ADP is quite slow. The agreement  
337 with the motor off-rate during processive stepping means that the motor must spend the majority of its cycle  
338 in this low affinity state, and modeling processivity as a kinetic race yields a tethered-head on-rate similar  
339 to the overall stepping rate. One caveat is that we are using the motor off-rate in ADP as a model of the  
340 post-hydrolysis state. Whether the head dissociates in the ADP-Pi state and rapidly releases Pi, or whether  
341 Pi release precedes dissociation is not known. There is evidence from kinesin-1 that the ADP-Pi state is  
342 higher affinity than the ADP state.<sup>36</sup> If this is the case for KIF1A, this would provide a quandary because  
343 the tethered-head on-rate would need to be slower than the overall stepping rate to explain the processivity  
344 of KIF1A. It has been suggested based on crystal structures in solution that the ADP-Pi state of KIF1A  
345 may have a lower microtubule affinity than the ADP state.<sup>26</sup> However, the relevance of these structures to  
346 microtubule-docked structures is questionable and there are no supporting functional data. A second caveat  
347 is that, if tethered head attachment is rate-limiting, then it implies a very fast ATP hydrolysis rate.  
348 Hydrolysis rates for other kinesins have been indirectly estimated to be a few hundred per second (Fig. 7,  
349 Table 2),<sup>28,34</sup> but the rate of hydrolysis is very difficult to measure quantitatively and is arguably the most  
350 poorly defined rate constant in the kinesin chemomechanical cycle. Nonetheless, a hydrolysis rate over  
351  $1000\text{ s}^{-1}$  seems unlikely, and because the KIF1A stepping cycle is so fast, rates below this imply that the  
352 time for hydrolysis is a non-negligible fraction of the cycle. In summary, our data support tethered head  
353 attachment as the sole rate limiting step, but there are caveats and a more precise estimate of this rate  
354 constant will require high-resolution head-tracking experiments as have been carried out for kinesin-1.<sup>27,53</sup>

### 355 *Origin of Superprocessivity and Load Sensitivity*

356 The finding that rear-head detachment is fast and tethered head attachment is rate-limiting means that the  
357 motor spends most of its cycle in a one-head-bound state, a property that would generally be expected to  
358 reduce processivity. The key characteristic of KIF1A that determines its superprocessivity is its slow off-  
359 rate in the post-hydrolysis state (state 5  $\rightarrow$  1, Fig. 1 and 7). This trait was observed first in the finding that

360 an engineered KIF1A monomer in low ionic strength buffer is capable of processive transport.<sup>24</sup> This  
361 electrostatic tethering thus contributes to both high velocity (by allowing fast rear head detachment) and  
362 superprocessivity (by minimizing probability of detachment during a step). However, a negative byproduct  
363 of the motor spending most of its time in a 1HB weak-binding state is that KIF1A tends to detach against  
364 applied loads.<sup>17,29-31</sup> In an optical trapping assay using the *C. elegans* KIF1A, Unc104, a 1 pN applied load  
365 led to a 10-fold increase in the motor detachment rate.<sup>19</sup> This effect is also seen in mixed motor assays,  
366 where minor fractions of the slower kinesin-1 mixed with the fast kinesin-3 lead to mixed motor speeds  
367 very similar to kinesin-1,<sup>31</sup> and in engineered pairs of kinesin-1 and kinesin-3, where the speed of the pair  
368 is very close to the speed of kinesin-1 alone.<sup>29</sup> These multi-motor assays suggest that when the slower  
369 kinesin-1 pulls against the faster kinesin-3, the kinesin-3 motors detach.

### 370 *Conclusions*

371 Defining the KIF1A chemomechanical cycle is important both for understanding the motor's diverse  
372 transport functions in cells and understanding how kinesins have evolved to achieve diverse  
373 mechanochemistry. From a design perspective, fast speed and superprocessivity provide competing  
374 constraints because each head must cyclically detach from the microtubule, while the dimeric motor  
375 remains associated over hundreds of steps. KIF1A does this by maximizing the rear head detachment rate  
376 and maintaining electrostatic association with the microtubule even in the weak binding post-hydrolysis  
377 state. As a result, however, the motor is sensitive to load. It may be that these motor properties have  
378 evolved for multi-motor transport where each motor feels only a small fraction of the load or where the  
379 rapid motor reattachment of KIF1A ensures a stable population of motors bound to the microtubule. The  
380 mitotic kinesin-5 motor, Eg5, provides a contrast to KIF1A in that it moves roughly 20-fold slower, is much  
381 less processive,<sup>54</sup> and is able to generate large forces as teams because it spends most of its hydrolysis cycle  
382 in a two-head- bound state.<sup>46,55,56</sup> Thus, by tuning their chemomechanical cycles, kinesins are able to achieve  
383 diverse mechanochemistry and carry out diverse cellular functions.

384



385 **Table 1**

386 **Rates and state durations of the KIF1A chemomechanical cycle**

| Parameter                 | Notation                       | Experimental                                        | Duration               | Source         |
|---------------------------|--------------------------------|-----------------------------------------------------|------------------------|----------------|
| Velocity (with pauses)    | $Vel_a$                        | $1.56 \pm 0.5$ $\mu\text{m/s}$                      |                        | Fig 2D         |
| Velocity (without pauses) | $Vel_b$                        | $1.77 \pm 0.4$ $\mu\text{m/s}$                      |                        | Fig 2D         |
| Run Length (Measured)     | $RL_a$                         | $3.6 \pm 0.04$ $\mu\text{m}$                        |                        | Fig 2E         |
| Run Length (Corrected)    | $RL_b$                         | $5.6 \pm 0.4$ $\mu\text{m}$                         |                        | Eq. 12         |
| Step Number               | Steps                          | $700 \pm 50$ steps                                  |                        | $RL_b / 8$ nm  |
| Stepping rate             | $k_{\text{step}}$              | $220 \pm 50$ $\text{s}^{-1}$                        | $4.5 \pm 1.0$ ms       | $Vel_b / 8$ nm |
| Mt off-rate in ATP        | $k_{\text{off}}^{\text{Mt}}$   | $0.28 \pm 0.09$ $\text{s}^{-1}$                     | $3.6 \pm 1.2$ s        | $Vel_a / RL_b$ |
| Mt off-rate in ADP        | $k_{\text{off}}^{\text{Mt}}$   | $0.27 \pm 0.11$ $\text{s}^{-1}$                     | $3.72 \pm 0.03$ s      | Fig 6D         |
| Half-site release rate    | $k_{\text{max}}^{\text{HS}}$   | $172 \pm 10$ $\text{s}^{-1}$                        | $5.8 \pm 0.4$ ms       | Fig 3C         |
| ATP for half-max release  | $K_{0.5}^{\text{HS}}$          | $119 \pm 21$ $\mu\text{M ATP}$                      |                        | Fig 3C         |
| ATP on-rate (lower limit) | $k_{\text{on}}^{\text{ATP}}$   | $\geq 1.4 \pm 0.3$ $\mu\text{M}^{-1} \text{s}^{-1}$ | $\leq 0.7 \pm 0.15$ ms | Fig 3C         |
| Mt on-rate                | $k_{\text{on}}^{\text{Mt}}$    | $17 \pm 4$ $\mu\text{M}^{-1} \text{s}^{-1}$         |                        | Fig 4A         |
| ATPase Cycle Rate         | $k_{\text{cat}}$               | $115 \pm 16$ $\text{s}^{-1}$                        | $8.7 \pm 1.2$ ms       | Fig 4B         |
| Michaelis-Menten constant | $K_M$                          | $1.2 \pm 0.5$ $\mu\text{M Mt}$                      |                        | Fig 4B         |
| Strained mADP off-rate    | $k_{\text{off}}^{\text{mADP}}$ | $616 \pm 86$ $\text{s}^{-1}$                        | $1.6 \pm 0.2$ ms       | Fig 5A         |
| Unstrained mADP off-rate  | $k_{\text{off}}^{\text{mADP}}$ | $354 \pm 78$ $\text{s}^{-1}$                        | $2.8 \pm 0.6$ ms       | Fig 5B         |
| Unstrained mADP on-rate   | $k_{\text{on}}^{\text{mADP}}$  | $29 \pm 15$ $\mu\text{M}^{-1} \text{s}^{-1}$        |                        | Fig 5B         |
| Solution ADP off-rate     | $k_{\text{off}}^{\text{ADP}}$  | $0.26 \pm 0.001$ $\text{s}^{-1}$                    | $3.8 \pm 0.02$ s       | Fig 5C         |
| Solution mADP off-rate    | $k_{\text{off}}^{\text{mADP}}$ | $0.27 \pm 0.005$ $\text{s}^{-1}$                    | $3.7 \pm 0.07$ s       | Fig 5D         |
| Tethered-head on-rate     | $k_{\text{on}}^{\text{TH}}$    | $189 \pm 78$ $\text{s}^{-1}$                        | $5.3 \pm 2$ ms         | Eq 1           |
| Hydrolysis rate           | $k_{\text{hyd}}$               | Fast*                                               | Fast* ms               | Eq 3           |
| Rear-head detachment rate | $k_{\text{off}}^{\text{RH}}$   | Fast*                                               | Fast* ms               | Eq 4           |

387 \*Fast refers to rates that are above our detection limit.

388

389

390 **Table 2.**

391 **Comparing kinetic parameters for the kinesin families 1, 2 and 3**

| Parameter                     | Kinesin-1       |                     |     | Kinesin-2       |                     |     | Kinesin-3       |                     |     |
|-------------------------------|-----------------|---------------------|-----|-----------------|---------------------|-----|-----------------|---------------------|-----|
|                               | Experimental    | Units               | Ref | Experimental    | Units               | Ref | Experimental    | Units               | Ref |
| $k_{on}^{Mt}$                 | $1.1 \pm 0.05$  | $\mu M^{-1} s^{-1}$ | a   | $4.6 \pm 0.9$   | $\mu M^{-1} s^{-1}$ | b   | $17 \pm 4$      | $\mu M^{-1} s^{-1}$ | e   |
| $k_{on}^{ATP}$                | $> 1.2 \pm 0.3$ | $\mu M^{-1} s^{-1}$ | d   | 18.0            | $\mu M^{-1} s^{-1}$ | b   | $> 1.4 \pm 0.3$ | $\mu M^{-1} s^{-1}$ | e   |
| $k_{hyd}$                     | $281 \pm 215$   | $s^{-1}$            | c   | $478 \pm 489$   | $s^{-1}$            | b   | n.d.            | $s^{-1}$            | e   |
| $k_{on}^{TH}$                 | $216 \pm 22$    | $s^{-1}$            | c   | $117 \pm 14$    | $s^{-1}$            | b   | $189 \pm 78$    | $s^{-1}$            | e   |
| $k_{off}^{ADP}$               | $367 \pm 4$     | $s^{-1}$            | d   | 390*            | $s^{-1}$            | b   | $615 \pm 86$    | $s^{-1}$            | e   |
| $k_{off}^{RH}$                | $154 \pm 17$    | $s^{-1}$            | d   | $89 \pm 25$     | $s^{-1}$            | b   | n.d.            | $s^{-1}$            | e   |
| $k_{cat}$                     | $67 \pm 11$     | $s^{-1}$            | c   | $42 \pm 4$      | $s^{-1}$            | b   | $115 \pm 16$    | $s^{-1}$            | e   |
| $k_{max}^{HS}$                | $112 \pm 9$     | $s^{-1}$            | d   | $\geq 47^*$     | $s^{-1}$            | b   | $172 \pm 10$    | $s^{-1}$            | e   |
| <b>Vel</b>                    | $533 \pm 3$     | nm/s                | d   | $400 \pm 40$    | nm/s                | c   | $1560 \pm 500$  | nm/s                | e   |
| <b>RL</b>                     | $860 \pm 20$    | nm                  | c   | $550 \pm 70$    | nm                  | c   | $5600 \pm 400$  | nm                  | e   |
| $k_{off}^{Mt \text{ in ATP}}$ | $0.81 \pm 0.14$ | $s^{-1}$            | c   | $0.73 \pm 0.12$ | $s^{-1}$            | c   | $0.28 \pm 0.09$ | $s^{-1}$            | e   |
| $k_{off}^{Mt \text{ in ADP}}$ | $2.0 \pm 0.2$   | $s^{-1}$            | c   | $2.3 \pm 0.2$   | $s^{-1}$            | c   | $0.27 \pm 0.11$ | $s^{-1}$            | e   |
| <b># Steps</b>                | $108 \pm 3$     | steps               | c   | $69 \pm 9$      | steps               | c   | $700 \pm 50$    | steps               | e   |
| $k_{step}$                    | $65 \pm 0.4$    | $s^{-1}$            | d   | $50 \pm 5$      | $s^{-1}$            | c   | $220 \pm 50$    | $s^{-1}$            | e   |

392

393 **Table 2 Caption:**

394 \*Some kinesin-2 values are approximate due to the motor's higher affinity for mADP than unlabeled-ADP,  
395 therefore, no error is reported.

396 References: **a**, Feng *et al.* 2018<sup>42</sup>; **b**, Chen *et al.* 2015<sup>34</sup>; **c**, Mickolajczyk and Hancock 2017<sup>28</sup>; **d**,  
397 Mickolajczyk *et al.* 2015<sup>27</sup>; **e**, This Study. Calculations and errors are propagated from reported values in  
398 reference papers.

399

## 400 METHODS

### 401 *Protein Constructs, Purification, and Activity Quantification*

402 The KIF1A construct used in the biochemical assays (KIF1A-406) consisted of the motor head and neck  
403 linker domains (1-368) of *Rattus norvegicus* KIF1A followed by 61 residues (445-405) from the neck-coil  
404 domain of *Drosophila melanogaster* KHC. The KIF1A construct used for the single-molecule experiments  
405 (KIF1A-560-GFP) includes an additional 216 residues from the coiled-coil domain of *DmKHC* followed  
406 by a C-terminal GFP. Both constructs included a C-terminal 6xHis-tag. These constructs match similar  
407 kinesin-1, -2, -5, and -7 constructs analyzed in previous studies.<sup>34,46,48</sup> The bacterial expression of KIF1A-  
408 560-GFP was carried out in a 2 L flask in-house followed by Ni gravity column chromatography  
409 purification with an elution buffer containing 10  $\mu$ M ATP and DTT, following published protocols.<sup>57,58</sup> The  
410 elution was exchanged into storage buffer (BRB80, 10  $\mu$ M ATP, 5 mM  $\beta$ ME, 5% glycerol) and then flash  
411 frozen and stored at  $-80^{\circ}\text{C}$ . The concentration of KIF1A-560-GFP was quantified using GFP absorption at  
412 488 nm.

413 The KIF1A-406 construct used for biochemical experiments was bacterially expressed in a Sartorius Biostat  
414 Cplus 30 L vessel at the CSL Behring Fermentation Facility at the Pennsylvania State University. The  
415 motor was purified by Ni column chromatography on an AKTA Pure FPLC system with an elution buffer  
416 containing 10  $\mu$ M ATP and DTT, following published protocols.<sup>34,57</sup> Following purification, KIF1A-406  
417 was incubated in 200  $\mu$ M mADP and then buffer exchanged into BRB80 buffer (80 mM PIPES, 1 mM  
418 EGTA, 1 mM  $\text{MgCl}_2$ , pH 6.9) plus 0.5  $\mu$ M or 10  $\mu$ M mADP using a PD10 G25 desalting column. Sucrose  
419 was then added to the peak fractions and aliquots flash frozen and stored at  $-80^{\circ}\text{C}$ . To quantify the active  
420 motor dimer concentrations for stopped flow assays, a motor sample was incubated with 1 mM ATP to  
421 chase off the bound mADP, the fluorescence of mADP (356-nm excitation/450-nm emission) measured  
422 and converted to [mADP] using a calibration curve, the solution mADP subtracted, and the value divided  
423 by two.<sup>34</sup> We found that the nearly  $\mu$ M mADP affinity for KIF1A in solution and competition with free

424 ATP from the purification procedure led to underestimates of the true active motor concentration by this  
425 method. Therefore, for ATPase assays where the active concentration was critical, the active motor  
426 concentration was determined by pelleting motors in the presence of microtubules and AMPPNP,  
427 quantifying the fraction of motors remaining in the supernatant via SDS-PAGE and ImageJ gel band  
428 intensity analysis, and multiplying this relative activity by the total motor concentration determined by  $A_{280}$ .

#### 429 *Single-Molecule Fluorescence Tracking*

430 Single-molecule tracking of GFP-labeled KIF1A-560 was performed on a Nikon TE2000 TIRF microscope  
431 at 25°C, as described previously.<sup>27,47,48</sup> Flow cells were functionalized by flowing in 0.5 mg/ml casein,  
432 followed by full-length rigor kinesin.<sup>27</sup> Taxol-stabilized microtubules, polymerized from a 1:20 ratio of  
433 Cy5-labeled (GE Healthcare) and unlabeled tubulin, were then introduced, and after a 5 min incubation,  
434 motors were introduced and imaged. KIF1A motile events were recorded at 5 or 10 fps and manually  
435 analyzed using the Kymograph Evaluation tool in FIESTA software<sup>59</sup> to determine the run length, velocity  
436 and dwell times. In the ADP dwell time assays, some trials contain hexokinase to reduce the amount of  
437 ATP contamination in solution. Calculations of observed motor off-rates per concentration were done using  
438 the relation  $k_{off}^{Mt} = 1/Dwell\ Time$ .<sup>34</sup> Plots of the observed off-rate as a function of ADP concentration were  
439 fit with the following equation to determine the maximum off-rate and dissociation constant of the motor  
440 for the microtubule in the nucleotide state.

$$k_{off}([ADP]) = k_{off,Apo}^{Mt} + \frac{(k_{off,ADP}^{Mt} - k_{off,Apo}^{Mt}) * [ADP]}{(K_D^{ADP} + [ADP])} \quad Eq. 2$$

#### 441 *ATPase Assays*

442 KIF1A ATPase rates were measured by quantifying the rate of NADH conversion in an enzyme coupled  
443 reaction at varying [Mt], as described by Huang and Hackney.<sup>34,60</sup> The reaction contained BRB80 with 1  
444 mM Mg-ATP, 2 mM phosphoenolpyruvate, 1 mM MgCl<sub>2</sub>, 0.2 mg/ml casein, 10 μM Taxol, 0.25 mM  
445 NADH, and [1.5/100] volume of PK/LDH (Sigma P-0294). Absorbance of NADH at 340 nm over time

446 was measured on a Molecular Devices FlexStation 3 Multi-mode Microplate Reader, converted to an  
447 ATPase rate, and divided by the active motor concentration to give the total hydrolysis cycle rate at 25°C.

#### 448 *Stopped Flow Setup*

449 Stopped-flow experiments were carried out at 25°C in BRB80 buffer using an Applied Photophysics SX20  
450 spectrofluorometer at 356-nm excitation with an HQ480SP emission filter. Each sample trial reported is  
451 based on the fit of the average trace of 5-7 consecutive shots. Concentrations reported below are pre-mix  
452 syringe concentrations, and thus are twice the final chamber concentrations. In the Results section, all  
453 concentrations are chamber reaction concentrations.

#### 454 *k<sub>on</sub><sup>Mt</sup> Experiments*

455 To obtain the bimolecular on-rate for microtubule binding, 300 nM mADP exchanged KIF1A dimers in 0.5  
456 μM free mADP were flushed against varying concentrations of taxol-stabilized microtubules in a solution  
457 of 2 mM ADP. The change in fluorescence due to release of mADP from the bound-head was fit with a  
458 double-exponential to determine the k<sub>obs</sub>. The fast phase of the exponential fits were plotted versus the  
459 microtubule concentration and fit linearly to obtain k<sub>on</sub><sup>Mt</sup>. The slow phase was attributed to slower mADP  
460 release by the second head.<sup>34</sup>

#### 461 *Half-Site Reactivity Experiment*

462 300 nM of mADP labeled KIF1A was flushed against a solution of 2 μM taxol-stabilized microtubules with  
463 or without 2 mM ATP. The change in fluorescence due to mADP release from the bound-head(s) was fit  
464 with a single-exponential to determine the amplitude, and the relative amplitudes compared in the presence  
465 and absence of ATP.<sup>40</sup>

#### 466 *Nucleotide-stimulated Half-site Release Assays*

467 To establish a one-head-bound complex, 300 nM of mADP exchanged KIF1A dimers was incubated with  
468 6 μM taxol-stabilized microtubules. This solution was then flushed against varying concentrations of ATP,

469 ATP $\gamma$ S or AMPPNP. The change in fluorescence due to release of mADP from the tethered-head was fit  
470 with a single-exponential, the rates plotted against the nucleotide concentration, and the curve fit with the  
471 Michaelis-Menten equation to obtain the maximum release rate and  $K_{0.5}$ .<sup>34,41</sup>

#### 472 *Nucleotide Exchange Experiments*

473 To determine the ADP solution off-rate, 0.3  $\mu$ M KIF1A in a solution of 0.5  $\mu$ M free ADP was flushed  
474 against 10  $\mu$ M mADP. In this configuration, the exponential increase in fluorescence from the binding of  
475 mADP is rate limited by the off-rate of ADP in solution. In the complementary assay to determine the  
476 mADP solution off-rate, 0.3  $\mu$ M mADP-exchanged KIF1A dimers in a solution of 0.5  $\mu$ M free mADP was  
477 flushed against 2 mM ADP. The exponential decrease in fluorescence was fit to obtain the off-rate of mADP  
478 in solution.

479 To determine the unstrained mADP exchange rate, 1  $\mu$ M mADP-exchanged KIF1A dimers were combined  
480 with 5  $\mu$ M taxol-stabilized microtubules and 0.5  $\mu$ M mADP to achieve a one-head-bound KIF1A-Mt  
481 complex. This solution was flushed against varying concentrations of mADP and the increase in  
482 fluorescence due to mADP binding fit to an exponential. To determine the strained mADP exchange rate,  
483 2  $\mu$ M KIF1A was pre-incubated with 10  $\mu$ M microtubules and 100  $\mu$ M AMPPNP to obtain a two-heads-  
484 bound complex with AMPPNP in the rear head and no nucleotide in the leading head.<sup>34,43,44,46</sup> This complex  
485 was flushed against varying concentrations of mADP and the rise in fluorescence due to mADP binding fit  
486 to an exponential. Due to the high free [mADP] in both of these assays, mADP binding was monitored by  
487 exciting at 280-nm and measuring the FRET signal between Trp in the motor domain and the mADP.<sup>61</sup> For  
488 both the unstrained and strained exchange assays, the exponential fits began at 2 ms, due to the instrument  
489 dead time. To obtain the ADP on- and off-rates, the resulting  $k_{obs}$  were plotted versus the mADP  
490 concentration and fit linearly with the equation  $k_{obs} = k_{on}*[mADP] + k_{off}$ .

#### 491 *Calculations*

492 State transition durations within the chemomechanical cycle were calculated using the following  
493 relationship:

$$\frac{1}{k_{\text{cat}}} = \frac{1}{k_{\text{on}}^{\text{ATP}} [\text{ATP}]} + \frac{1}{k_{\text{hyd}}} + \frac{1}{k_{\text{on}}^{\text{TH}}} + \frac{1}{k_{\text{off, FH}}^{\text{ADP}}} + \frac{1}{k_{\text{off}}^{\text{RH}}} \quad \text{Eq. 3}$$

494 Additionally, the relationship between the total step duration and the time for half-site release is as  
495 follows:

$$\frac{1}{k_{\text{cat}}} = \frac{1}{k_{\text{max}}^{\text{ATP/HS}}} + \frac{1}{k_{\text{off}}^{\text{RH}}} \quad \text{Eq. 4}$$

496

#### 497 *Run Length Correction for Finite Microtubule Lengths*

498 KIF1A has a long run length which results in a significant fraction of motors that run off the microtubule  
499 end, which if not accounted for, leads to an underestimate of the run length. Thus, motor run lengths  
500 were corrected for finite microtubule lengths, as follows.

501 For every event, the run length was recorded, along with whether the motor dissociated from some point  
502 along the microtubule or ran off the end. Motor stepping was assumed to be history independent and thus  
503 the run lengths were assumed to be exponentially distributed with a mean run length of  $\theta = 1/\lambda$ . If the  
504 microtubule was infinitely long, the standard model for the run length would have probability density:

$$f_{\lambda}(x) = \lambda e^{-\lambda x} \quad \text{Eq. 5}$$

505 The run lengths for  $n$  motors corresponding to our observations are  $\{X_1, X_2, \dots, X_n\}$ . For motors that run  
506 off the end of the microtubule, we know the distance from the landing point of the motor to the end of  
507 the microtubule and notate the value as  $t_i$ . The measured run lengths,  $Y_i$ , including events that run off  
508 the end, are the minimum of the true run length,  $X_i$ , and the distance to the end of the microtubule,  $t_i$ :

$$Y_i = \min(X_i, t_i) \quad \text{Eq. 6}$$

509 We also define a variable  $W_i$ , denoting whether the motor dissociated normally from the lattice ( $W_i = 1$ ) or  
510 ran off the end ( $W_i = 0$ ). Our data will then be  $Y_i, W_i$  with  $t_i$  serving as a known covariate. Our goal is to  
511 solve for the rate of dissociation (in inverse distance),  $\lambda$ .

512 The log of the likelihood function is defined as:

513

$$\log L_{Y,W}(\lambda) = \sum_{i=1}^n (W_i(\log \lambda - \lambda Y_i) + (1 - W_i)(-\lambda t_i)) \quad \text{Eq. 7}$$

514 To maximize the likelihood, we take the derivative with respect to  $\lambda$  and set it to zero. Then, because  
515 we define the mean run length as  $\theta = 1/\lambda$ , we can simplify to the following equation:

$$\hat{\theta} = \frac{\sum_{i=1}^n W_i Y_i + \sum_{i=1}^n (1 - W_i) t_i}{\sum_{i=1}^n W_i} \quad \text{Eq. 8}$$

516 Under some broad regularity conditions, the asymptotic variance for a maximum likelihood estimator  
517 is the reciprocal of the Fisher information. So,  $\hat{\theta}$  should be approximately normally distributed with mean  
518  $\theta$  and a variance of:

$$\frac{\theta^2}{\sum_{i=1}^n (1 - e^{-t_i/\theta})} \quad \text{Eq. 9}$$

519 Assuming the average of the  $Y_i$  is defined as

$$Y_{ave} = \frac{\sum_{i=1}^n Y_i}{n} \quad \text{Eq. 10}$$

520 We can define  $t_i = Y_i$  and simplify the maximum likelihood estimator equation to:

$$\hat{\theta} = \frac{\sum_{i=1}^n Y_i}{\sum_{i=1}^n W_i} = \frac{Y_{ave}}{\frac{1}{n} \sum_{i=1}^n W_i} \quad \text{Eq. 11}$$



521 As such, the denominator represents the fraction of motors that detach normally from the lattice. Leading  
522 to the following interpretation:

$$\hat{\theta} = \frac{Y_{\text{ave}}}{\text{Fraction detach}} = \frac{Y_{\text{ave}}}{(1 - \text{Fraction run off end})} \quad \text{Eq. 12}$$

523 So, if all motors detach normally, then the run length is the average, but, for example, if half of the motors  
524 reach the end, then the run length is corrected up by a factor of 2. This correction should apply generally  
525 for processes that generate exponential distributions with censoring, such as photobleaching. The  
526 correction is similar to the Kaplan-Meier estimate that was used for run length corrections by Ruhnnow *et*  
527 *al*, but has a simpler form.<sup>62</sup> In addition, we are using an asymptotic result for the variance as opposed to  
528 the bootstrap method found in Ruhnnow *et al*.

529

530 **REFERENCES**

- 531 (1) Hirokawa, N.; Noda, Y.; Tanaka, Y.; Niwa, S. Kinesin Superfamily Motor Proteins and  
532 Intracellular Transport. *Nat. Rev. Mol. Cell Biol.* **2009**, *10*, 682–696.
- 533 (2) Hirokawa, N.; Niwa, S.; Tanaka, Y. Molecular Motors in Neurons: Transport Mechanisms and  
534 Roles in Brain Function, Development, and Disease. *Neuron* **2010**, *68* (4), 610–638.
- 535 (3) Siddiqui, N.; Straube, A. Intracellular Cargo Transport by Kinesin-3 Motors. *Biochem.* **2017**, *82*  
536 (7), 803–815.
- 537 (4) Okada, Y.; Yamazaki, H.; Sekine-Aizawa, Y.; Hirokawa, N. The Neuron-Specific Kinesin  
538 Superfamily Protein KIF1A Is a Unique Monomeric Motor for Anterograde Axonal Transport of  
539 Synaptic Vesicle Precursors. *Cell* **1995**, *81* (5), 769–780.
- 540 (5) Hirokawa, N. Kinesin and Dynein Superfamily Proteins and the Mechanism of Organelle  
541 Transport. *Science* **1998**, *279* (5350), 519–526.
- 542 (6) Pennings, M.; Schouten, M. I.; Gaalen, J. van; Meijer, R. P. P. P.; Bot, S. T. de; Kriek, M.; Saris,  
543 C. G. J. J.; Berg, L. H. van den; Es, M. A. van; Zuidgeest, D. M. H. H.; et al. KIF1A Variants Are  
544 a Frequent Cause of Autosomal Dominant Hereditary Spastic Paraplegia. *Eur. J. Hum. Genet.*  
545 **2020**, *28* (1), 40–49.
- 546 (7) Yonekawa, Y.; Harada, A.; Okada, Y.; Funakoshi, T.; Kanai, Y.; Takei, Y.; Terada, S.; Noda, T.;  
547 Hirokawa, N. Defect in Synaptic Vesicle Precursor Transport and Neuronal Cell Death in KIF1A  
548 Motor Protein–Deficient Mice. *J. Cell Biol.* **1998**, *141* (2), 431–441.
- 549 (8) Chiba, K.; Takahashi, H.; Chen, M.; Obinata, H.; Arai, S.; Hashimoto, K.; Oda, T.; McKenney, R.  
550 J.; Niwa, S. Disease-Associated Mutations Hyperactivate KIF1A Motility and Anterograde Axonal  
551 Transport of Synaptic Vesicle Precursors. *Proc. Natl. Acad. Sci.* **2019**, *116* (37), 18429–18434.
- 552 (9) Miki, H.; Okada, Y.; Hirokawa, N. Analysis of the Kinesin Superfamily: Insights into Structure

- 553 and Function. *Trends Cell Biol.* **2005**, *15* (9), 467–476.
- 554 (10) Hirokawa, N.; Takemura, R. Molecular Motors and Mechanisms of Directional Transport in  
555 Neurons. *Nat. Rev. Neurosci.* **2005**, *6* (3), 201–214.
- 556 (11) Miki, H.; Setou, M.; Kaneshiro, K.; Hirokawa, N. All Kinesin Superfamily Protein, KIF, Genes in  
557 Mouse and Human. *Proc. Natl. Acad. Sci.* **2001**, *98* (13), 7004–7011.
- 558 (12) Lawrence, C. J.; Dawe, R. K.; Christie, K. R.; Cleveland, D. W.; Dawson, S. C.; Endow, S. A.;  
559 Goldstein, L. S. B.; Goodson, H. V.; Hirokawa, N.; Howard, J.; et al. A Standardized Kinesin  
560 Nomenclature. *J. Cell Biol.* **2004**, *167* (1), 19–22.
- 561 (13) Lessard, D. V.; Zinder, O. J.; Hotta, T.; Verhey, K. J.; Ohi, R.; Berger, C. L. Polyglutamylation of  
562 Tubulin's C-Terminal Tail Controls Pausing and Motility of Kinesin-3 Family Member KIF1A. *J.*  
563 *Biol. Chem.* **2019**, *294* (16), 6353–6363.
- 564 (14) Soppina, V.; Norris, S. R.; Dizaji, A. S.; Kortus, M.; Veatch, S.; Peckham, M.; Verhey, K. J.  
565 Dimerization of Mammalian Kinesin-3 Motors Results in Superprocessive Motion. *PNAS* **2014**,  
566 *111* (15), 5562–5567.
- 567 (15) Soppina, V.; Verhey, K. J. The Family-Specific K-Loop Influences the Microtubule on-Rate but  
568 Not the Superprocessivity of Kinesin-3 Motors. *Mol. Biol. Cell* **2014**, *25* (14), 2161–2170.
- 569 (16) Guedes-Dias, P.; Nirschl, J. J.; Abreu, N.; Tokito, M. K.; Janke, C.; Magiera, M. M.; Holzbaur, E.  
570 L. F. F. Kinesin-3 Responds to Local Microtubule Dynamics to Target Synaptic Cargo Delivery to  
571 the Presynapse. *Curr. Biol.* **2019**, *29* (2), 268-282.e8.
- 572 (17) Okada, Y.; Higuchi, H.; Hirokawa, N. Processivity of the Single-Headed Kinesin KIF1A through  
573 Binding to Tubulin. *Nature* **2003**, *424* (6948), 574–577.
- 574 (18) Okada, Y.; Hirokawa, N. Mechanism of the Single-Headed Processivity: Diffusional Anchoring  
575 between the K-Loop of Kinesin and the C Terminus of Tubulin. *Proc. Natl. Acad. Sci.* **2000**, *97*

- 576 (2), 640–645.
- 577 (19) Tomishige, M. Conversion of Unc104/KIF1A Kinesin into a Processive Motor After  
578 Dimerization. *Science* **2002**, 297 (5590), 2263–2267.
- 579 (20) Al-Bassam, J.; Cui, Y.; Klopfenstein, D.; Carragher, B. O.; Vale, R. D.; Milligan, R. A. Distinct  
580 Conformations of the Kinesin Unc104 Neck Regulate a Monomer to Dimer Motor Transition. *J.*  
581 *Cell Biol.* **2003**, 163 (4), 743–753.
- 582 (21) Rashid, D. J.; Bononi, J.; Tripet, B. P.; Hodges, R. S.; Pierce, D. W. Monomeric and Dimeric  
583 States Exhibited by the Kinesin-Related Motor Protein KIF1A. *J. Pept. Res.* **2005**, 65 (6), 538–  
584 549.
- 585 (22) Kikkawa, M.; Okada, Y.; Hirokawa, N. 15 Å Resolution Model of the Monomeric Kinesin Motor,  
586 KIF1A. *Cell* **2000**, 100 (2), 241–252.
- 587 (23) Kikkawa, M.; Sablin, E. P.; Okada, Y.; Yajima, H.; Fletterick, R. J.; Hirokawa, N. Switch-Based  
588 Mechanism of Kinesin Motors. *Nature* **2001**, 411 (24), 439–445.
- 589 (24) Okada, Y.; Hirokawa, N. A Processive Single-Headed Motor: Kinesin Superfamily Protein  
590 KIF1A. *Science* **1999**, 283 (5405), 1152–1157.
- 591 (25) Liu, F.; Ji, Q.; Wang, H.; Wang, J. Mechanochemical Model of the Power Stroke of the Single-  
592 Headed Motor Protein KIF1A. *J. Phys. Chem. B* **2018**, 122 (49), 11002–11013.
- 593 (26) Nitta, R.; Kikkawa, M.; Okada, Y.; Hirokawa, N. KIF1A Alternately Uses Two Loops to Bind  
594 Microtubules. *Science* **2004**, 305 (5684), 678–683.
- 595 (27) Mickolajczyk, K. J.; Deffenbaugh, N. C.; Ortega Arroyo, J.; Andrecka, J.; Kukura, P.; Hancock,  
596 W. O. Kinetics of Nucleotide-Dependent Structural Transitions in the Kinesin-1 Hydrolysis Cycle.  
597 *Proc. Natl. Acad. Sci.* **2015**, 112 (52), E7186–E7193.

- 598 (28) Mickolajczyk, K. J.; Hancock, W. O. Kinesin Processivity Is Determined by a Kinetic Race from a  
599 Vulnerable One-Head-Bound State. *Biophys. J.* **2017**, *112* (12), 2615–2623.
- 600 (29) Norris, S. R.; Soppina, V.; Dizaji, A. S.; Schimert, K. I.; Sept, D.; Cai, D.; Sivaramakrishnan, S.;  
601 Verhey, K. J. A Method for Multiprotein Assembly in Cells Reveals Independent Action of  
602 Kinesins in Complex. *J. Cell Biol.* **2014**, *207* (3), 393–406.
- 603 (30) Arpağ, G.; Norris, S. R.; Mousavi, S. I.; Soppina, V.; Verhey, K. J.; Hancock, W. O.; Tüzel, E.  
604 Motor Dynamics Underlying Cargo Transport by Pairs of Kinesin-1 and Kinesin-3 Motors.  
605 *Biophys. J.* **2019**, *116* (6), 1115–1126.
- 606 (31) Ker Arpa, G.; Shastry, S.; Hancock, W. O.; Tüzel, E.; Arpağ, G.; Shastry, S.; Hancock, W. O.;  
607 Tüzel, E.; Ker Arpa, G.; Shastry, S.; et al. Transport by Populations of Fast and Slow Kinesins  
608 Uncovers Novel Family-Dependent Motor Characteristics Important for In Vivo Function.  
609 *Biophys. J.* **2014**, *107* (8), 1896–1904.
- 610 (32) Yildiz, A.; Tomishige, M.; Vale, R. D.; Selvin, P. R. Kinesin Walks Hand-Over-Hand. *Science*  
611 **2004**, *303* (5658), 676–678.
- 612 (33) Mickolajczyk, K. J.; Cook, A. S. I.; Jevtha, J. P.; Fricks, J.; Hancock, W. O. Insights into Kinesin-  
613 1 Stepping from Simulations and Tracking of Gold Nanoparticle-Labeled Motors. *Biophys. J.*  
614 **2019**, *117* (2), 331–345.
- 615 (34) Chen, G.-Y.; Arginteanu, D. F. J.; Hancock, W. O. Processivity of the Kinesin-2 KIF3A Results  
616 from Rear Head Gating and Not Front Head Gating. *J. Biol. Chem.* **2015**, *290* (16), 10274–10294.
- 617 (35) Andreasson, J. O. L.; Shastry, S.; Hancock, W. O.; Block Correspondence, S. M.; Block, S. M.  
618 The Mechanochemical Cycle of Mammalian Kinesin-2 KIF3A/B under Load. *Curr. Biol.* **2015**, *25*  
619 (9), 1166–1175.
- 620 (36) Milic, B.; Andreasson, J. O. L.; Hancock, W. O.; Block, S. M. Kinesin Processivity Is Gated by

- 621 Phosphate Release. *Proc. Natl. Acad. Sci.* **2014**, *111* (39), 14136–14140.
- 622 (37) Andreasson, J. O.; Milic, B.; Chen, G.-Y.; Guydosh, N. R.; Hancock, W. O.; Block, S. M.
- 623 Examining Kinesin Processivity within a General Gating Framework. *Elife* **2015**, *4*, e07403.
- 624 (38) Hancock, W. O. The Kinesin-1 Chemomechanical Cycle: Stepping Toward a Consensus. *Biophys.*
- 625 *J.* **2016**, *110* (6), 1216–1225.
- 626 (39) Vale, R. D. The Way Things Move: Looking Under the Hood of Molecular Motor Proteins.
- 627 *Science* **2000**, *288* (5463), 88–95.
- 628 (40) Hackney, D. D. Evidence for Alternating Head Catalysis by Kinesin during Microtubule-
- 629 Stimulated ATP Hydrolysis. *Proc. Natl. Acad. Sci. U. S. A.* **1994**, *91* (15), 6865–6869.
- 630 (41) Ma, Y. Z.; Taylor, E. W. Interacting Head Mechanism of Microtubule-Kinesin ATPase. *J. Biol.*
- 631 *Chem.* **1997**, *272* (2), 724–730.
- 632 (42) Feng, Q.; Mickolajczyk, K. J.; Chen, G.-Y.; Hancock, W. O. Motor Reattachment Kinetics Play a
- 633 Dominant Role in Multimotor-Driven Cargo Transport. *Biophys. J.* **2018**, *114* (2), 400–409.
- 634 (43) Schnapp, B. J.; Crise, B.; Sheetz, M. P.; Reese, T. S.; Khan, S. Delayed Start-up of Kinesin-Driven
- 635 Microtubule Gliding Following Inhibition by Adenosine 5'-[Beta,Gamma-Imido]Triphosphate.
- 636 *Proc. Natl. Acad. Sci.* **1990**, *87* (24), 10053–10057.
- 637 (44) Guydosh, N. R.; Block, S. M. Backsteps Induced by Nucleotide Analogs Suggest the Front Head
- 638 of Kinesin Is Gated by Strain. *Proc. Natl. Acad. Sci. U. S. A.* **2006**, *103* (21), 8054–8059.
- 639 (45) Hackney, D. D. Kinesin ATPase: Rate-Limiting ADP Release. *Proc. Natl. Acad. Sci. U. S. A.*
- 640 **1988**, *85* (17), 6314–6318.
- 641 (46) Chen, G.-Y.; Mickolajczyk, K. J.; Hancock, W. O. The Kinesin-5 Chemomechanical Cycle Is
- 642 Dominated by a Two-Heads-Bound State. *J. Biol. Chem.* **2016**, *291* (39), 20283–20294.

- 643 (47) Shastry, S.; Hancock, W. O. Neck Linker Length Determines the Degree of Processivity in  
644 Kinesin-1 and Kinesin-2 Motors. *Curr. Biol.* **2010**, *20* (10), 939–943.
- 645 (48) Shastry, S.; Hancock, W. O. Interhead Tension Determines Processivity across Diverse N-  
646 Terminal Kinesins. *Proc. Natl. Acad. Sci.* **2011**, *108* (39), 16253–16258.
- 647 (49) Yajima, J.; Alonso, M. C.; Cross, R. A.; Toyoshima, Y. Y. Direct Long-Term Observation of  
648 Kinesin Processivity at Low Load. *Curr. Biol.* **2002**, *12* (01), 301–306.
- 649 (50) Scarabelli, G.; Soppina, V.; Yao, X.-Q. Q.; Atherton, J.; Moores, C. A.; Verhey, K. J.; Grant, B. J.  
650 Mapping the Processivity Determinants of the Kinesin-3 Motor Domain. *Biophys. J.* **2015**, *109*  
651 (8), 1537–1540.
- 652 (51) Atherton, J.; Farabella, I.; Yu, I. M.; Rosenfeld, S. S.; Houdusse, A.; Topf, M.; Moores, C. A.  
653 Conserved Mechanisms of Microtubule-Stimulated ADP Release, ATP Binding, and Force  
654 Generation in Transport Kinesins. *Elife* **2014**, *3*, e03680.
- 655 (52) Ren, J.; Zhang, Y.; Wang, S.; Huo, L.; Lou, J.; Feng, W. Structural Delineation of the Neck Linker  
656 of Kinesin-3 for Processive Movement. *J. Mol. Biol.* **2018**, *430* (14), 2030–2041.
- 657 (53) Isojima, H.; Iino, R.; Niitani, Y.; Noji, H.; Tomishige, M. Direct Observation of Intermediate  
658 States during the Stepping Motion of Kinesin-1. *Nat. Chem. Biol.* **2016**, *12* (4), 290–297.
- 659 (54) Valentine, M. T.; Fordyce, P. M.; Krzysiak, T. C.; Gilbert, S. P.; Block, S. M. Individual Dimers  
660 of the Mitotic Kinesin Motor Eg5 Step Processively and Support Substantial Loads in Vitro. *Nat.*  
661 *Cell Biol.* **2006**, *8* (5), 470–476.
- 662 (55) Saunders, A. M.; Powers, J.; Strome, S.; Saxton, W. M. Kinesin-5 Acts as a Brake in Anaphase  
663 Spindle Elongation. *Curr. Biol.* **2007**, *17* (12), 453–454.
- 664 (56) Shimamoto, Y.; Forth, S.; Kapoor, T. M. Measuring Pushing and Braking Forces Generated by  
665 Ensembles of Kinesin-5 Crosslinking Two Microtubules. *Dev. Cell* **2015**, *34* (6), 669–681.

- 666 (57) Uppalapati, M.; Huang, Y.; Shastry, S.; Jackson, T. N.; Hancock, W. O. Microtubule Motors in  
667 Microfluidics. *Methods Bioeng. Microfabr. Microfluid.* **2009**, 311–337.
- 668 (58) Gicking, A. M.; Wang, P.; Liu, C.; Mickolajczyk, K. J.; Guo, L.; Hancock, W. O.; Qiu, W. The  
669 Orphan Kinesin PAKRP2 Achieves Processive Motility via a Noncanonical Stepping Mechanism.  
670 *Biophys. J.* **2019**, *116* (7), 1270–1281.
- 671 (59) Ruhnnow, F.; Zwicker, D.; Diez, S. Tracking Single Particles and Elongated Filaments with  
672 Nanometer Precision. *Biophys. J.* **2011**, *100* (11), 2820–2828.
- 673 (60) Huang, T.-G. G.; Suhan, J.; Hackney, D. D.; Suhan, J.; Hackney, D. D.; Suhan, J.; Hackney, D. D.  
674 Drosophila Kinesin Motor Domain Extending to Amino Acid Position 392 Is Dimeric When  
675 Expressed in Escherichia Coli. *J. Biol. Chem.* **1994**, *269* (23), 16502–16507.
- 676 (61) Cheng, J. Q.; Jiang, W.; Hackney, D. D. Interaction of Mant-Adenosine Nucleotides and  
677 Magnesium with Kinesin. *Biochemistry* **1998**, *37* (15), 5288–5295.
- 678 (62) Ruhnnow, F.; Kloß, L.; Diez, S. Challenges in Estimating the Motility Parameters of Single  
679 Processive Motor Proteins. *Biophys. J.* **2017**, *113* (11), 2433–2443.
- 680
- 681
- 682
- 683
- 684
- 685
- 686



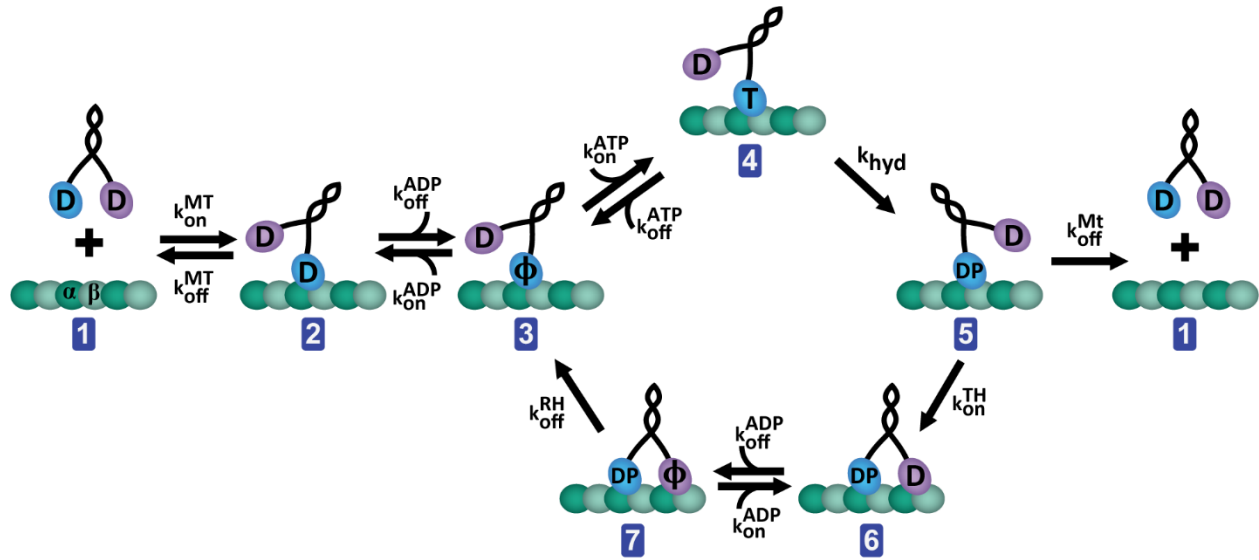

687

688 **Figure 1. Canonical kinesin chemomechanical cycle.** The motor protein begins with ADP bound to both  
 689 motor domains in solution (state 1). Upon binding to the microtubule (state 2), one ADP is released, locking  
 690 the motor in a strongly bound state, while the other ADP remains bound to the tethered head (state 3). ATP  
 691 then binds to the bound head (state 4) and is hydrolyzed to ADP-Pi (state 5), triggering full neck linker  
 692 docking, which positions the tethered head forward and puts the motor in a weakly-bound state.<sup>27</sup> From this  
 693 vulnerable state 5, the bound head can detach from the microtubule and terminate the processive run (state  
 694 1). More often, the tethered head binds to its next binding site (state 6) and ADP is released to generate a  
 695 tightly-bound state 7 that completes the forward step. Detachment and Pi release by the rear head returns  
 696 the motor to the ATP binding state (state 3).<sup>27,28,34-37</sup> D=ADP; T=ATP; DP= ADP-Pi;  $\phi$ =Apo.

697

698

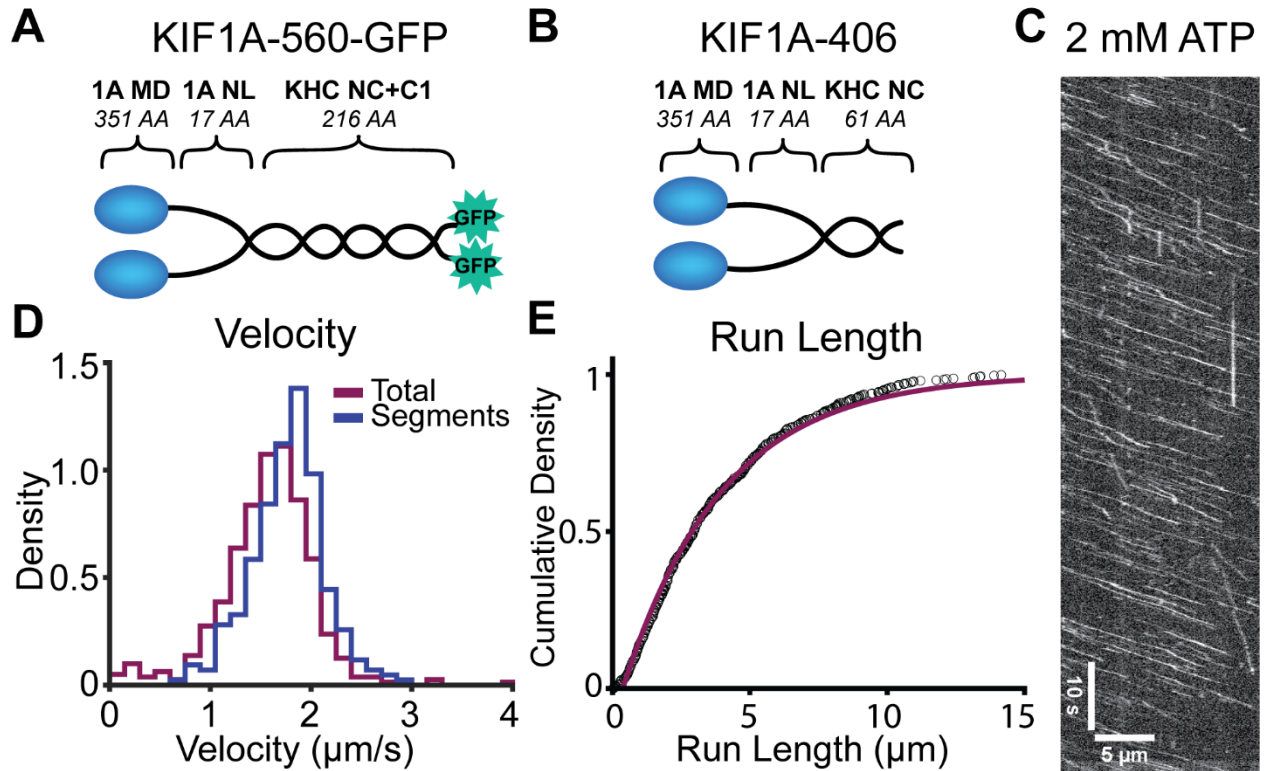

699

700 **Figure 2. Bacterially expressed KIF1A dimer is fast and superprocessive.** **A**, Diagram of KIF1A-560-  
701 GFP construct used in single-molecule assays. **B**, Diagram of KIF1A-406 construct used in biochemical  
702 assays. (Diagrams in **A** and **B** are not to scale). **C**, Kymograph of KIF1A-560-GFP motility in 2 mM ATP  
703 at 10 fps. **D**, Histogram of velocities determined from measuring the total trace (including pauses), and the  
704 linear regions of traces (excluding pauses). Mean velocities were  $1.56 \pm 0.5 \mu\text{m/s}$  (mean  $\pm$  SD,  $N = 534$ )  
705 for total traces and  $1.77 \pm 0.4 \mu\text{m/s}$  (mean  $\pm$  SD,  $N = 285$ ) for linear regions. **E**, Single-molecule run length  
706 of  $3.6 \pm 0.04 \mu\text{m}$  (mean  $\pm$  95% confidence,  $N=534$ ) was determined by cumulative density fit to the run  
707 lengths above  $0.4 \mu\text{m}$ . Statistical analysis of the traces terminated by microtubule length gives an estimated  
708 total run length of  $5.6 \pm 0.4 \mu\text{m}$  (see Methods). *Abbreviations*, 1A, KIF1A; MD, motor domain; NL, neck  
709 linker; KHC, kinesin heavy chain; NC, neck coil; C1, coil-1; GFP, green fluorescent protein.

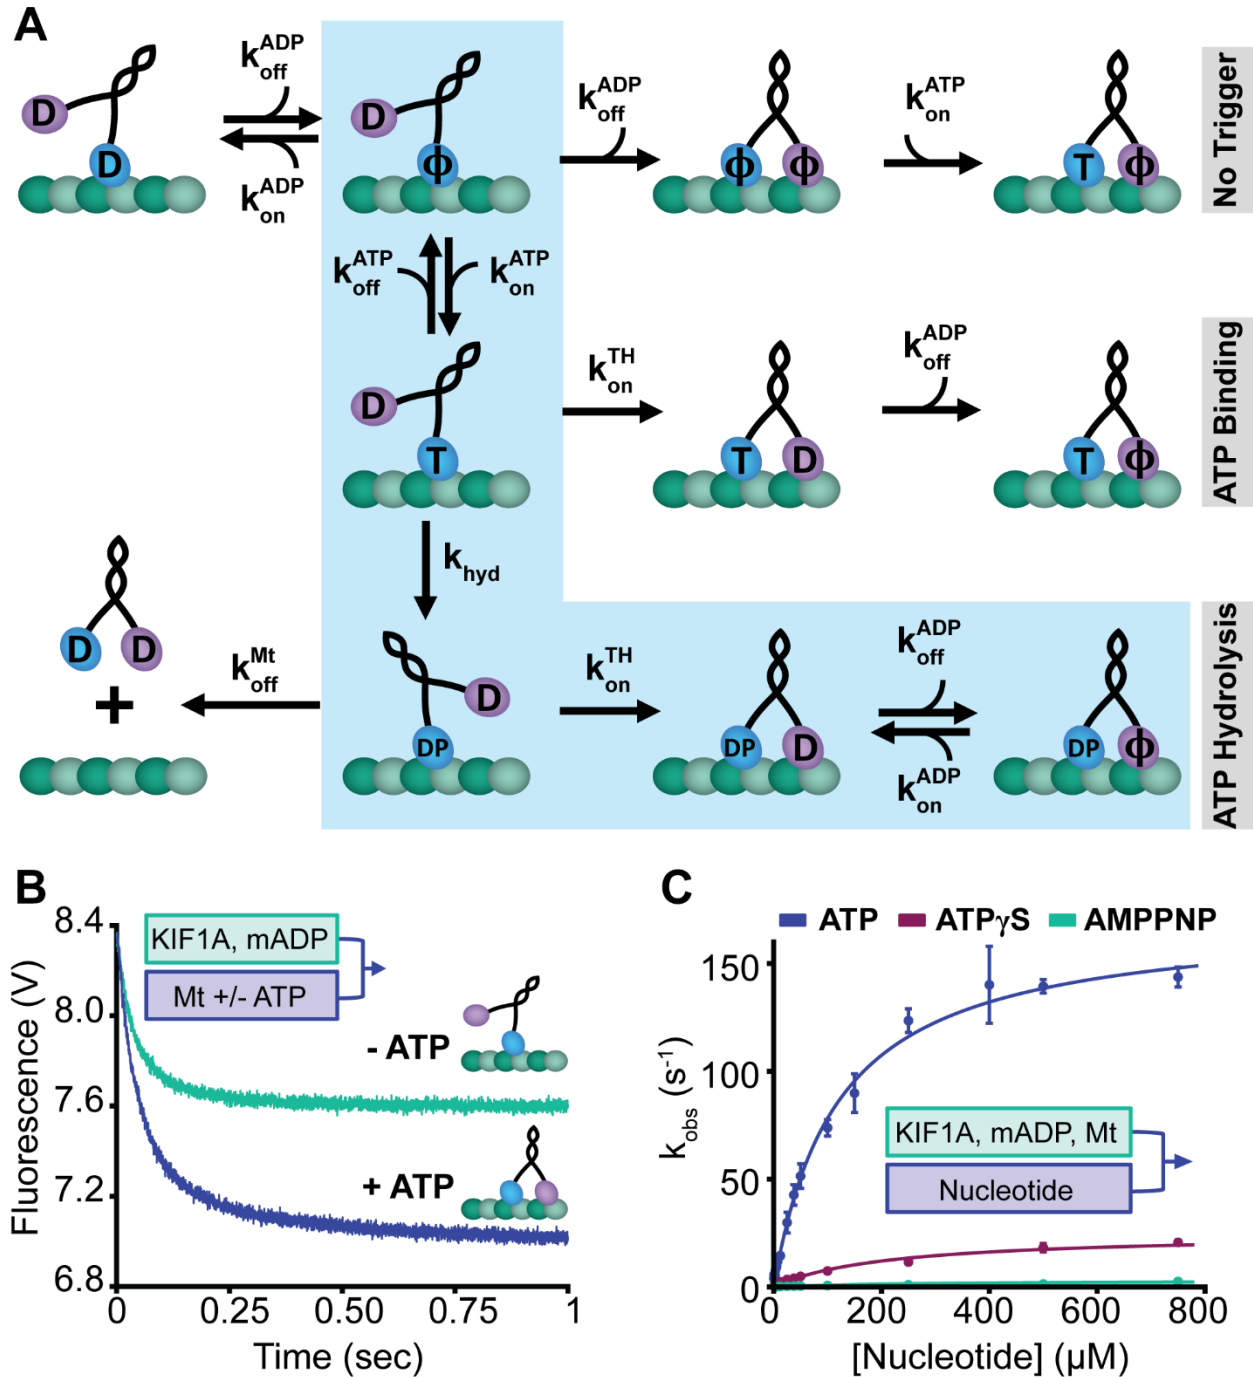

710

711 **Figure 3. The forward step of KIF1A is triggered by ATP Hydrolysis.** A, Diagram of three proposed  
 712 models for the stepping trigger in the KIF1A chemomechanical cycle. In the No Trigger model, the tethered  
 713 head steps independent of the nucleotide state of the bound head. In the ATP Binding model, ATP binding  
 714 to the bound head triggers the forward step by the tethered head. In the ATP Hydrolysis-triggered model,

715 highlighted by light blue shading, ATP hydrolysis is required for forward stepping by the tethered head.  
716 D=ADP; T=ATP; DP= ADP-P<sub>i</sub>;  $\phi$ =Apo. **B**, KIF1A half-site reactivity experiment. 150 nM of mADP-  
717 labelled KIF1A was flushed against a solution of 1  $\mu$ M microtubules either with or without 1 mM ATP (all  
718 final chamber concentrations). Amplitudes of the traces were 0.7 V in the absence of nucleotide and 1.2 V  
719 in the presence of ATP. **C**, Nucleotide-triggered Half-Site Release Assay. 150 nM of mADP-exchanged  
720 KIF1A and 3  $\mu$ M microtubules were flushed against varied concentrations of the ATP, ATP $\gamma$ S, or AMPPNP  
721 (all final chamber concentrations). Fitting with a hyperbola gave maximal rates of  $172 \pm 10 \text{ s}^{-1}$ ,  $25 \pm 6 \text{ s}^{-1}$ ,  
722 and  $0.44 \pm 0.03 \text{ s}^{-1}$  for ATP, ATP $\gamma$ S, and AMPPNP, respectively (fit  $\pm$  95% confidence interval). The  
723 corresponding K<sub>0.5</sub> values were  $119 \pm 21 \mu\text{M}$ ,  $215 \pm 110 \mu\text{M}$ , and  $22 \pm 7 \mu\text{M}$  for ATP, ATP $\gamma$ S, and  
724 AMPPNP, respectively (fit  $\pm$  95% CI).

725

726

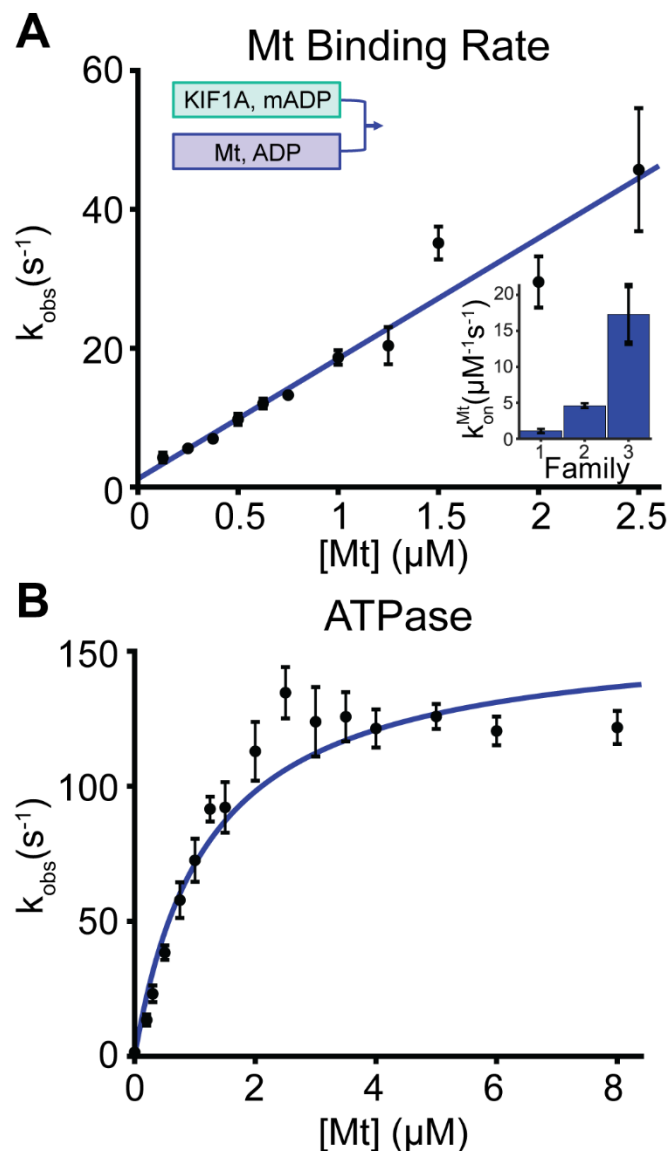

727

728

729 **Figure 4. KIF1A ATPase and Microtubule on-rate.** **A**, KIF1A microtubule on-rate, measured by mADP  
730 release by the motor upon binding to the microtubule. A linear fit to the observed rates as a function of  
731 microtubule concentration gave a bimolecular on-rate,  $k_{\text{on}}^{\text{Mt}} = 17 \pm 4 \mu\text{M}^{-1} \text{s}^{-1}$  (fit  $\pm$  95% CI; N=3 trials per  
732 point with N=5-7 shots per trial; error bars are SEM). **Inset:** Comparing microtubule binding rates in  
733 BRB80 for kinesin-1, -2 and -3.<sup>34,42</sup> **B**, Microtubule-stimulated ATPase of KIF1A. A Michaelis-Menten fit  
734 weighted by the inverse of SEM of the points (N=6 trials per point), gave a  $k_{\text{cat}}$  of  $115 \pm 16 \text{s}^{-1}$  and a  $K_{\text{m}}$  of  
735  $1.2 \pm 0.5 \mu\text{M}$  (fit  $\pm$  95% confidence interval).

736

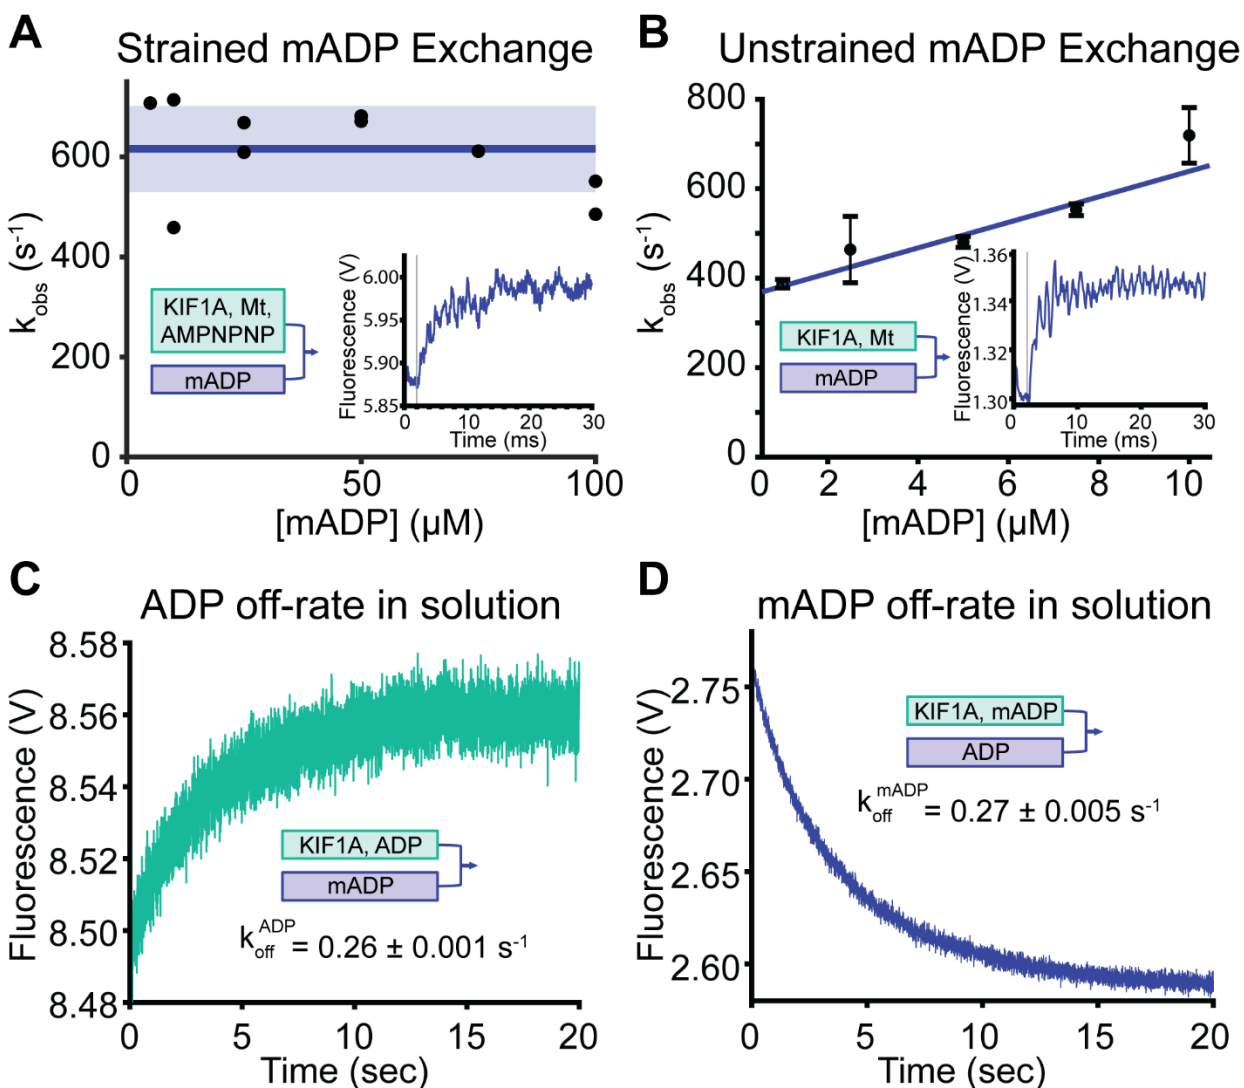

737

738 **Figure 5. KIF1A has a high ADP off-rate.** **A**, Exchange rate of mADP in the front head of KIF1A when  
 739 the motor is in the 2HB state. 1  $\mu\text{M}$  KIF1A, 5  $\mu\text{M}$  microtubules and 50  $\mu\text{M}$  AMPNP were combined and  
 740 flushed against varied [mADP] (all final chamber concentrations). Solid blue line at 616  $\text{s}^{-1}$  indicates the  
 741 mean rate across all [mADP]. (Shaded region is  $\pm$  SD, N=2 trials) **Inset**, raw trace of stopped flow results  
 742 at final [mADP] = 100  $\mu\text{M}$ , N=6 traces averaged. Grey line at 2 ms indicates start of fit. **B**, Exchange rate  
 743 of mADP in the bound head of KIF1A when the motor is in the 1HB state. 0.5  $\mu\text{M}$  mADP-exchanged  
 744 KIF1A dimers, 2.5  $\mu\text{M}$  microtubules and 0.25  $\mu\text{M}$  mADP were combined and flushed against varied

745 [mADP] (all final chamber concentrations). Linear fit using  $k_{\text{obs}} = k_{\text{on}}^{\text{mADP}} * [\text{mADP}] + k_{\text{off}}^{\text{mADP}}$  gives  $k_{\text{on}}^{\text{mADP}}$   
746  $= 29 \pm 15 \mu\text{M}^{-1} \text{s}^{-1}$  and  $k_{\text{off}}^{\text{mADP}} = 354 \pm 78 \text{s}^{-1}$  (N=3 trials per point, fit  $\pm$  95% CI, error bars are SEM). **Inset**,  
747 raw trace of stopped-flow results at 10  $\mu\text{M}$  mADP, N=6 traces averaged. **C**, Time course of ADP  
748 dissociation from KIF1A in the absence of microtubules, triggered by flushing 0.15  $\mu\text{M}$  motors in 0.25  $\mu\text{M}$   
749 unlabeled ADP against 5  $\mu\text{M}$  mADP (all final chamber concentrations). An exponential fit, which is  
750 governed by the off-rate of unlabeled ADP, gives  $0.26 \pm 0.001 \text{s}^{-1}$ . (Fit  $\pm$  95% CI, N=5-7 traces averaged).  
751 **D**, Time course of mADP dissociation from KIF1A in the absence of microtubules, triggered by flushing  
752 0.15  $\mu\text{M}$  motors and 0.25  $\mu\text{M}$  of mADP against 1 mM unlabeled ADP (all final chamber concentrations).  
753 Exponential fit gives  $0.27 \pm 0.005 \text{s}^{-1}$  (Fit  $\pm$  95% CI, N=5-7 traces averaged).  
754

755

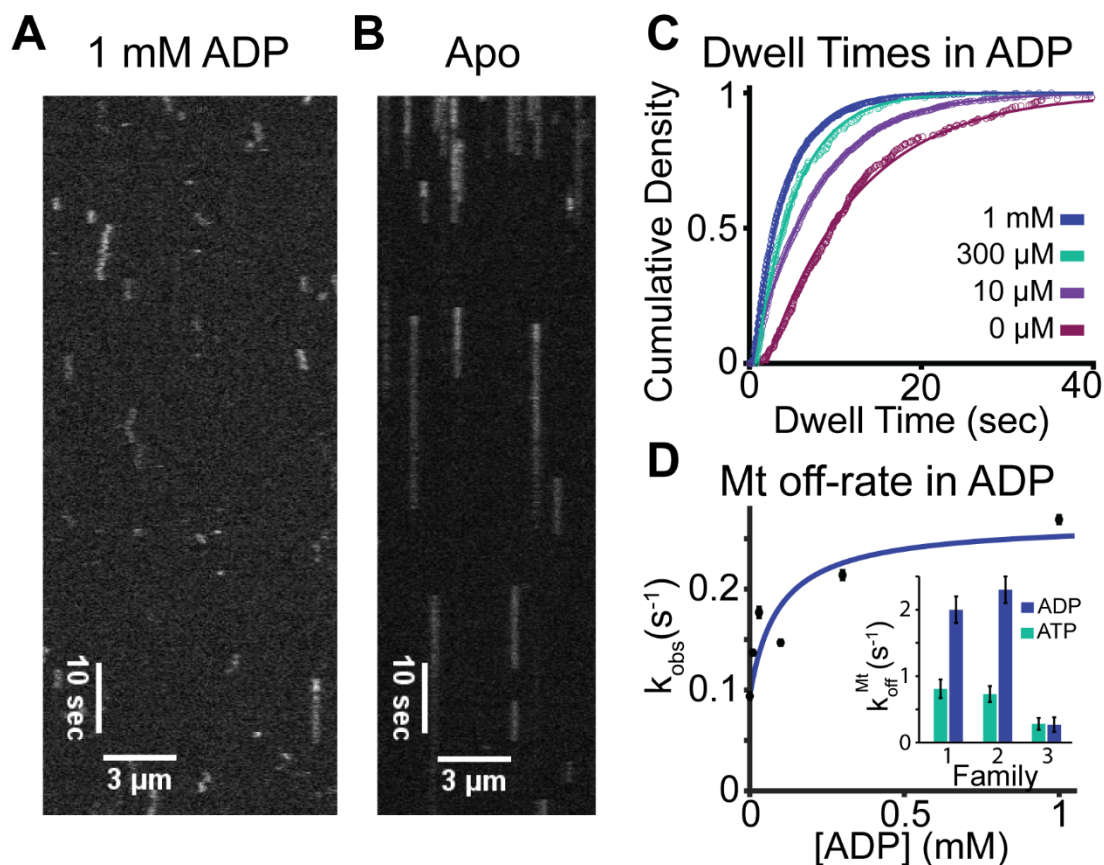

756

757 **Figure 6. Microtubule affinity of KIF1A at varying ADP concentrations by single-molecule assay. A,**  
 758 Kymograph for KIF1A-560-GFP in 1 mM ADP at 5 fps. **B,** Kymograph for KIF1A-560-GFP in the absence  
 759 of nucleotide (apo) at 5 fps. **C,** Cumulative density fit to dwell time distributions in 0, 0.01, 0.3 and 1 mM  
 760 ADP gives  $10.6 \pm 0.2$  s,  $7.3 \pm 0.02$  s,  $4.7 \pm 0.06$  s, and  $3.7 \pm 0.03$  s, respectively. Inverse of these durations  
 761 give microtubule off-rates of  $0.09 \pm 0.002$  s<sup>-1</sup>,  $0.14 \pm 0.0002$  s<sup>-1</sup>,  $0.21 \pm 0.003$  s<sup>-1</sup>,  $0.27 \pm 0.002$  s<sup>-1</sup>,  
 762 respectively. Values presented as fit  $\pm$  95% confidence intervals. **D,** Microtubule off-rate of KIF1A versus  
 763 the ADP concentration. Fit with Eq. 1 (See Methods) gives a maximum off-rate of  $0.27 \pm 0.11$  s<sup>-1</sup> in  
 764 saturating ADP, an apo state off-rate of  $0.09 \pm 0.2$   $\mu$ M, and a  $K_{0.5}$  of  $93 \pm 204$   $\mu$ M (all fit  $\pm$  95% confidence).  
 765 **Inset,** Comparing  $k_{\text{off}}^{\text{Mt}}$  in ATP (green bars) and ADP (blue bars) in BRB80 for Kinesin-1, -2, and -3.<sup>28</sup>

766



767

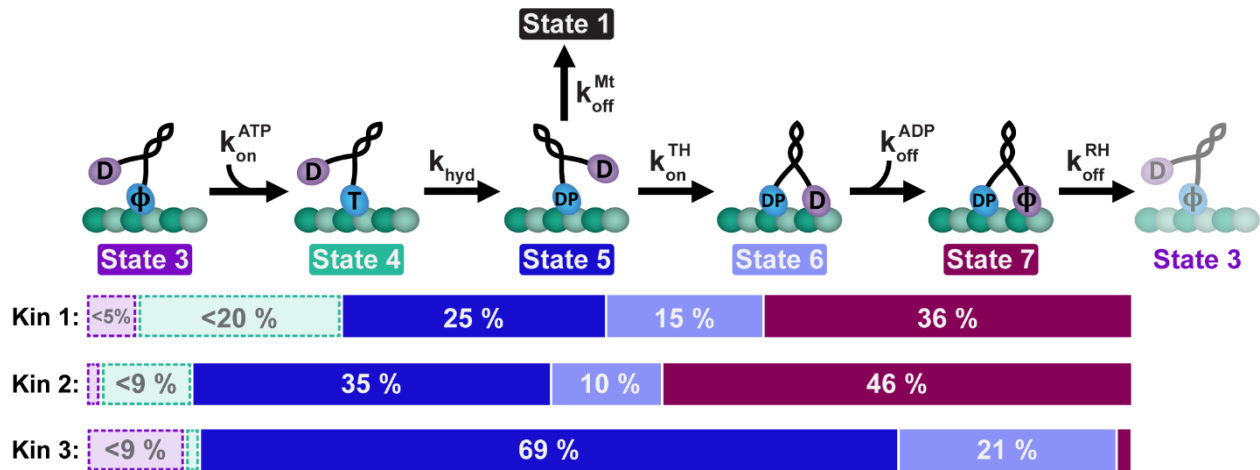

768

769

770 **Figure 7. Comparison of stepping cycles for Kinesin-1, -2 and -3.** The percent of time spent in each  
 771 chemomechanical state is compared for Kinesin-1 (KHC),<sup>27,28,42</sup> Kinesin-2 (KIF3A),<sup>28,34</sup> and Kinesin-3  
 772 (KIF1A). The state numbers correspond to those in Fig. 1. Dashed boxes represent uncertainty of the  
 773 duration due to experimental limitations of the ATP on-rate and ATP hydrolysis rate determinations. Small  
 774 boxes without labels represent a state duration that is <1% of the cycle time. The total cycle duration used  
 775 for the determination of the percentages presented here is the sum of the state durations. See Table 2 for  
 776 exact values. D=ADP; T=ATP; DP= ADP-P<sub>i</sub>;  $\phi$ =Apo.

777
